# Pleiotropic Influence of DNA Methylation QTLs on physiological and aging traits

Khyobeni Mozhui<sup>1,2,#</sup>, Hyeonju Kim<sup>1</sup>, Flavia Villani<sup>2</sup>, Amin Haghani<sup>3,4</sup>, Saunak Sen<sup>1</sup>, Steve Horvath<sup>3,4,5</sup>

<sup>1</sup>Department of Preventive Medicine, University of Tennessee Health Science Center, College of Medicine, Memphis, TN, USA.

<sup>2</sup>Department of Genetics, Genomics and Informatics, University of Tennessee Health Science Center, College of Medicine, Memphis, TN, USA.

<sup>3</sup>Department of Human Genetics, David Geffen School of Medicine, University of California Los Angeles, Los Angeles, CA, USA.

<sup>4</sup>Altos Labs, San Diego, CA, USA.

<sup>5</sup>Department of Biostatistics, Fielding School of Public Health, University of California Los Angeles, Los Angeles, CA, USA.

#Correspondence: [kmozhui@uthsc.edu](mailto:kmozhui@uthsc.edu)

15 **Abstract**

16 DNA methylation is influenced by genetic and non-genetic factors. Here, we chart quantitative  
17 trait loci (QTLs) that modulate levels of methylation at highly conserved CpGs using liver  
18 methylome data from mouse strains belonging to the BXD Family. A regulatory hotspot on  
19 chromosome 5 had the highest density of trans-acting methylation QTLs (trans-meQTLs)  
20 associated with multiple distant CpGs. We refer to this locus as meQTL.5a. The trans-modulated  
21 CpGs showed age-dependent changes, and were enriched in developmental genes, including  
22 several members of the MODY pathway (maturity onset diabetes of the young). The joint  
23 modulation by genotype and aging resulted in a more “aged methylome” for BXD strains that  
24 inherited the DBA/2J parental allele at meQTL.5a. Further, several gene expression traits, body  
25 weight, and lipid levels mapped to meQTL.5a, and there was a modest linkage with lifespan.  
26 DNA binding motif and protein-protein interaction enrichment analysis identified the hepatic  
27 nuclear factor, *Hnf1a* (MODY3 gene in humans), as a strong candidate. The pleiotropic effects  
28 of meQTL.5a could contribute to variation in body size and metabolic traits, and influence CpG  
29 methylation and epigenetic aging that could have an impact on lifespan.

30

31 **Key words:** methylation, epigenome, aging, metabolism, genetics, lifespan

## 32 Introduction

33 Genome-wide patterns in DNA methylation (DNAm) are established during development  
34 and are critical for cell differentiation and cell identity.<sup>1</sup> The canonical form of DNAm involves  
35 the addition of a methyl- group to the cytosine residue at CG dinucleotides (i.e., CpG  
36 methylation). The methylation status of CpGs is a part of the epigenetic landscape that serves  
37 as a stable and yet reprogrammable form of gene expression regulation.<sup>2,3</sup> On one hand,  
38 methylation of CpGs are important for sustaining and perpetuating expression signatures and in  
39 giving each organ and tissue its functional identity. On the other hand, the methylome is  
40 dynamic and a modifiable molecular process that enables the genome to respond and adapt to  
41 ever changing environmental and nutritional states.<sup>4,5</sup> Due to its modifiability, DNAm is  
42 profoundly altered by the passage of time, and tracks closely with age and aging.<sup>6,7</sup>

43 Along with aging and modifications by extrinsic factors, CpG methylation can also be  
44 influenced by underlying genetic sequence variants. Several studies in humans have identified  
45 genetic loci that are associated with DNAm.<sup>8-10</sup> Analogues to gene expression quantitative trait  
46 loci (eQTLs),<sup>11</sup> a genetic region that influences the quantitative variation in CpG methylation is  
47 referred to as a methylation QTL, or meQTL (alternatively also shortened to “mQTL”; although  
48 that can be confused with “metabolite QTL” and “module QTL”<sup>12,13</sup>). Several human studies  
49 have performed genome-wide association studies (GWAS) for CpG methylation, and there are  
50 now large-scale multi-tissue meQTL atlases available for humans.<sup>14,15</sup> Similar to the  
51 classification of eQTLs into cis- and trans-effects, meQTLs are also categorized into cis-meQTLs  
52 or trans-meQTLs, depending on the distance between the meQTL regulatory locus, and the  
53 target CpG.<sup>15,16</sup> Cis-meQTLs are highly enriched for genetic loci that have been associated with  
54 complex traits, and genetic variation in methylation levels are implicated in disease risk.<sup>9,10,17,18</sup>  
55 An meQTL region can be associated with multiple distal CpGs in trans, and similar to trans-eQTL  
56 hotspots, such sites represent trans-meQTL hotspots.<sup>8,10,19</sup> Trans-meQTL hotspots implicate  
57 causal modulators with widespread influence on CpGs. There is now growing evidence that  
58 DNA binding factors and transcription factors (TFs) play a role in shaping the methylome by  
59 exerting trans-regulatory influence on CpGs.<sup>10,20-22</sup> For instance, during hepatocyte  
60 differentiation, TFs such as the hepatocyte nuclear factors (HNFs) and GATA family are reported  
61 to regulate the dynamic spatial and temporal patterns in DNAm.<sup>23</sup>

62 Model organisms provide a powerful tool for interrogating the interactions between  
63 meQTLs, eQTLs, and experimental conditions such as diets and drugs. However, although  
64 genome-scale meQTL studies in humans date back to the 2010s,<sup>24</sup> there is an over 10-year lag  
65 in methylome-wide meQTL studies in rodent populations. This is partly due to the lack of a cost-  
66 effective and scalable DNAm microarray for model organisms that is comparable to the Illumina  
67 HumanMethylation Infinium BeadChips.<sup>25</sup> A few of us attempted to repurpose the human  
68 arrays to measure methylation in mice.<sup>26-28</sup> Indeed a small proportion of the CpG probes on the  
69 human arrays map to conserved sequences, and could be considered as “pan-mammalian”  
70 interrogators of the epigenome. More recently, a truly pan-mammal array, the  
71 HorvathMammalMethylChip40, was custom developed.<sup>29,30</sup> A unique aspect of the array is that  
72 the probes map to conserved sequences, and this has opened up new avenues for large multi-  
73 species comparative epigenomics.<sup>31,32</sup> We used this array to track epigenetic changes with aging  
74 when mice are subjected to two different dietary conditions.<sup>6</sup> Our data incorporated genetic

75 diversity as we profiled members on the BXD Family. In the present work, we use the  
76 methylome data for an meQTL mapping study.

77 The BXDs are a family of recombinant inbred (RI) and advanced intercross (AI) mouse  
78 strains. We have previously described the BXDs in greater detail.<sup>33-36</sup> In brief, the BXD Family  
79 consists of about 150 inbred members derived from two progenitor strains: C57BL/6J (B6) and  
80 DBA/2J (D2). The BXDs have a long history in quantitative genetics and the earlier sets of RI  
81 strains were used to map simpler Mendelian traits.<sup>37,38</sup> Subsequently, additional sets of RI and  
82 AI strains were added to the growing family, and over the years, the BXDs have accrued a vast  
83 compendium of phenotypic data ranging from metabolic, physiologic, lifespan, to behavioral  
84 and neural traits, and multi-omic datasets (e.g., transcriptomics, proteomics, and  
85 metabolomics).<sup>35,39-41</sup> This is matched by deep genome sequence data with over 6 million  
86 genetic variants segregating in the family, making the BXDs a powerful mammalian panel for  
87 systems genetics, and systems epigenetics.<sup>6,30,33,42,43</sup>

88 In our previous work, we studied the genetic regulation of epigenetic clocks in the BXDs and  
89 examined metabolic and dietary factors that are related to the age-dependent methylation  
90 changes.<sup>6</sup> Here, we focus on meQTLs that influence individual CpGs, and evaluate the genetic  
91 architecture of CpG methylation in liver tissue. We identify meQTL hotspots that influence  
92 multiple distal CpGs. The region on chromosome (Chr) 5 harbored the highest density of co-  
93 localized trans-meQTLs, and we refer to this genetic interval as meQTL.5a. This region also  
94 contains a high-density of QTLs linked to gene expression both at the transcriptomic (eQTLs)  
95 and proteomic (pQTLs) levels. For the CpGs that are trans-modulated by meQTL.5a, the pattern  
96 of variance indicates a genotype dependent susceptibility to the effects of aging, and to an  
97 extent, diet. Specifically, we find a more aged methylome for strains that have the D2 allele at  
98 meQTL.5a. Further, we find a pleiotropic effect of this locus on body weight, and for this, the B6  
99 allele was associated with a positive additive effect. The contrasting allelic effects on the two  
100 traits may moderate the impact on this locus on lifespan. Based on DNA binding motif  
101 enrichment and protein-protein interaction (PPI), we identify the hepatic nuclear factor, *Hnf1a*,  
102 as one of the important candidate genes in meQTL.5a. In humans, mutations in *HNF1A* results  
103 in MODY3 (maturity onset diabetes of the young 3),<sup>44</sup> and our results indicate a trans-  
104 modulatory effect of meQTL.5a on CpGs located in several other genes that are part of the  
105 MODY pathway. Overall, our results suggest a convergent effect of age and diet on CpGs that  
106 are also partly influenced by an meQTL. We propose a model in which the meQTL.5a has both a  
107 horizontal and vertical pleiotropic effect on physiological traits, DNAm, and lifespan.

108

## 109 **Result**

### 110 **Overview of meQTL distribution in the mouse genome**

111 The HorvathMammalMethylChip40 array contains probes for 27966 CpGs that have been  
112 validated for the mouse genome.<sup>6,30</sup> We have used this to assay the liver methylome in a  
113 population of BXDs (details on the samples are in **Data S1**). To uncover genetic loci that  
114 modulate methylation variation at these CpGs, we performed linkage mapping across the  
115 autosomal chromosome (Chrs).<sup>33</sup> QTL mapping was implemented in R/qtl2 and adjusted for  
116 age, diet, the top methylome-wide principal component, and the BXD's kinship matrix.<sup>45</sup> For

117 each of the 27966 CpGs, we plotted its genome-wide highest LOD score, and the distance  
118 between the maximal meQTL marker, and the CpG location (**Fig 1a**; genome-wide peak LOD  
119 data for each CpG is in **Data S2**). Strong meQTLs tended to reside within 10 Mb of the  
120 corresponding CpGs, and we classified these regulatory loci as cis-meQTLs, and the targeted  
121 CpG as cis-CpGs. Note that due to the family-based population and the comparatively larger  
122 haplotypes in the BXDs,<sup>33</sup> we have used a much larger interval rather than the <1 Mb interval  
123 that is typically used to assign cis-effects in human association studies.<sup>8,15</sup> In total, 3921 CpGs  
124 (14% of the CpGs we examined) mapped to at least one meQTL at a nominal LOD  $\geq 3.5$ . Many of  
125 the CpGs were polygenic and mapped to more than one locus (in other words, a CpG with a  
126 strong cis-meQTL may also have lower QTLs in trans). The meQTLs showed an uneven  
127 distribution with some loci having a trans-modulatory linkage to many distal CpGs that  
128 potentially signify a regulatory hotspot (**Fig 1b**). At such trans-meQTL hotspots, there is an  
129 imbalance in which parental allele increased methylation (i.e., has the positive additive effect).  
130 For instance, majority of the CpGs that have meQTLs on markers on Chr 5 (~115 Mb) are  
131 associated with higher methylation for the allele from the D2 parent (*D* allele) (**Fig 1b**). On Chr2  
132 (~110 Mb), it is the allele from the B6 parent (*B* allele) that is associated with higher  
133 methylation. This is consistent with reports from human studies that SNPs associated with  
134 multiple CpGs in trans have the same direction of allelic effect.<sup>22</sup> The allelic effects are clearly  
135 visible when we consider only the genome-wide peak LOD markers for each CpG (i.e., each CpG  
136 linked to only its genome-wide strongest meQTL marker). **Fig 1c** plots the locations of 1416  
137 peak LOD markers against the location of 3921 CpGs that mapped at LOD  $\geq 3.5$ . Of these, 1833  
138 CpGs mapped as cis-meQTLs (meQTLs to marker ratio of 1.98). The remaining 2088 CpGs had  
139 peak LOD at 691 unique markers that were distant from the location of the CpG (meQTL to  
140 marker ratio of 3.02). These QTLs are classified as trans-meQTLs, and the CpGs are referred to  
141 as trans-CpGs. For the cis-meQTLs, the number of loci in which the *B* allele had the positive  
142 additive effect (909 cis-meQTLs) was similar to the number of loci in which the *D* allele had the  
143 positive additive effect (924 cis-meQTLs). However, for the trans-meQTLs, there was a  
144 preponderance for higher methylation for the *D* allele (1413 or 68% of the trans-CpGs).

145 In terms of genomic locations and chromatin states, the cis-CpGs were enriched for introns  
146 and intergenic regions, and were located in transcriptionally permissive states (Tr-P), but were  
147 highly depleted in active and bivalent promoters (Pr-A and Pr-B, respectively), transcriptionally  
148 strong states (Tr-S) (**Fig 1d,e**; **Table S1**), and gene exons, promoters and 3' and 5' UTRs. Trans-  
149 CpGs on the other hand, were enriched in enhancer sites, and depleted in promoter regions  
150 (**Fig 1d, e**; **Table S1**).

151 To examine how the genetic variation in methylation relate to variance associated with  
152 aging, diet, body weight, and genotype dependent longevity (variables that we have reported in  
153 detail in <sup>6</sup>), we examined the proportion of differentially methylated CpGs (DMCs) that map as  
154 cis- or trans-meQTLs. The cis-CpGs were only modestly enriched in DMCs associated with  
155 genotype-dependent lifespan (lifespan differentially methylated CpGs or LS-DMC;  
156 hypergeometric enrichment  $p = 0.003$ ), and were depleted in DMCs related to age, weight, and  
157 diet (**Fig 1f**; **Table S2**). This indicates that variance of CpGs that are under cis-modulation are  
158 largely due to genetics. In contrast, the trans-CpGs were highly enriched in CpGs that gained  
159 methylation with age (age-gain), and CpGs associated with weight, diet, and LS-DMCs. This

160 suggests that variance of CpGs that are under trans-modulation are multi-factorial and  
 161 influenced by both genetic and non-genetic factors.

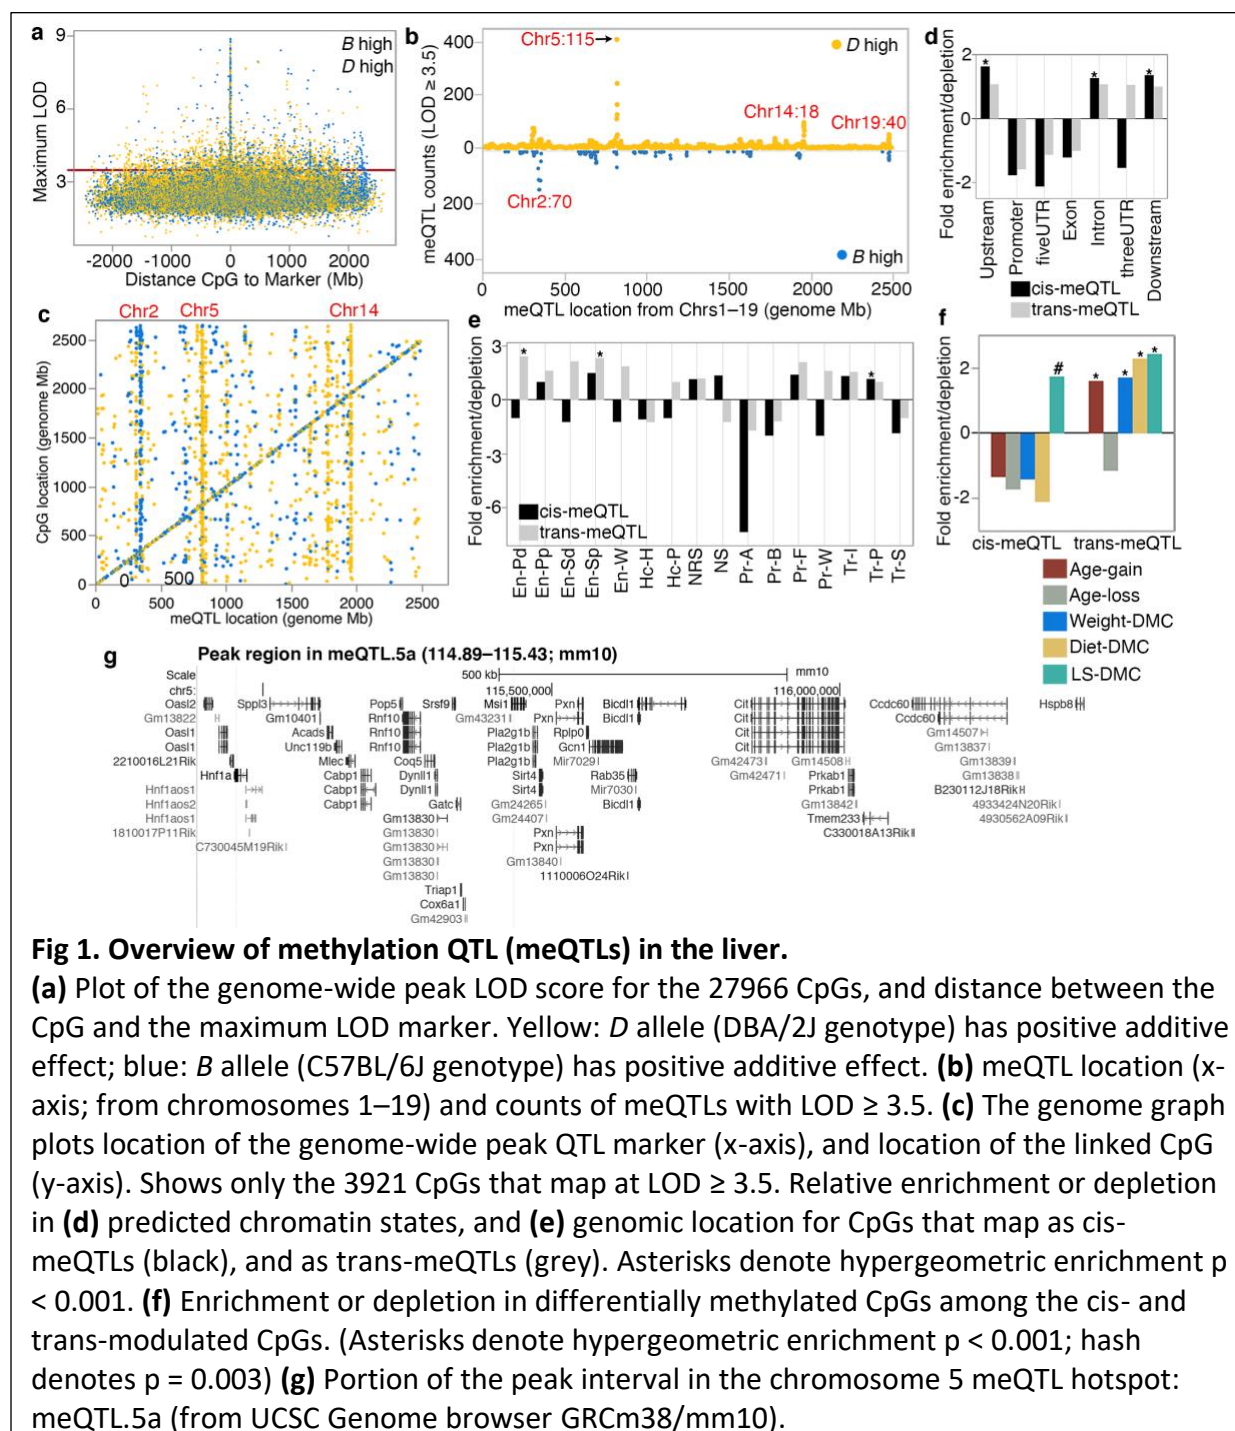

## 162 meQTL hotspots and association with gene expression

163 To define regions that contain a high density of meQTLs, we took the 3921 CpGs with  
 164 maximal LOD  $\geq 3.5$  and counted the number of meQTLs linked to each genotype marker. 18  
 165 markers were associated with 20 or more meQTLs and we classified these as putative meQTL



166 hotspots (**Table S3**). A few of these are mostly cis-meQTL regions. For example, the two  
167 neighboring markers on Chr19, rs30567369 (47.51 Mb) and rs31157694 (47.94 Mb), were  
168 linked to 58 CpGs in cis. We have previously reported this region as a QTL for liver epigenetic  
169 age acceleration (distal portion of “epigenetic age acceleration QTL on Chr19” or Eaa19).<sup>6</sup>

170 For trans effects, the highest number of trans-meQTLs per marker was on Chr5, ~115 Mb  
171 (**Fig 1b, c, g**). Here, the SNP marker rs29733222 (115.43 Mb; coordinates based on  
172 GRCm38/mm10) is linked to 230 genome-wide peak trans-meQTLs, and only 3 genome-wide  
173 peak cis-meQTLs (**Table S3**). As several neighboring markers in this Chr5 region were linked to  
174 multiple meQTLs, we roughly delineated a 10 Mb interval (110–120 Mb) as a liver meQTL  
175 hotspot and refer this region as meQTL.5a. In total, 535 meQTLs mapped to meQTL.5a at the  
176 3.5 LOD score threshold (502 trans-meQTLs, 33 cis-meQTLs; **Table 1; Data S2**). Majority of the  
177 trans-meQTLs in meQTL.5a (435 of the 502) were associated with higher methylation for the *D*  
178 allele, and only 67 trans-meQTLs were associated with higher DNAm for the *B* allele.

179 Similarly, we demarcated broad 10 Mb intervals around the other putative meQTL hotspots  
180 and counted the number of CpGs that have peak LOD scores in these intervals. We tabulated 8  
181 putative meQTL hotspots that are in Chrs 2, 4, 5, 7, 14, and 19 (**Table 1**). To examine if these  
182 meQTL intervals also influence gene expression we referred to an existing BXD liver RNA-seq  
183 data (previously reported in <sup>41</sup>) and searched for transcripts that map to the 10 Mb intervals  
184 listed in **Table 1** at eQTL LOD  $\geq$  3.5. meQTL.5a had the largest number of eQTLs, followed by  
185 Eaa19 (**Table 1**; lists of transcripts that map to meQTL.5a and Eaa19 are in **Data S3** and **Data**  
186 **S4**). meQTL.5a had 376 liver eQTLs that included 36 cis-eQTLs from positional candidate genes  
187 such as *Cit*, *Sirt4*, and *Hspb8*. Eaa19, despite being primarily a cis-meQTL locus, had an  
188 abundance of trans-eQTLs (**Table 1**). Somewhat surprisingly, for all the meQTL intervals, there  
189 was very little overlap between meQTLs and eQTLs, even for the strong cis-effects that suggests  
190 limited co-regulation of the methylome and the transcriptome. Only a few genes (listed in **Table**  
191 **1**) had concordant meQTLs and eQTLs in the same locus, and of these, only the QTLs for *Cln3*  
192 and *Tenm3* in meQTL.5a were *trans*-effects. For both *Cln3* and *Tenm3*, the trans-modulated  
193 CpGs (cg16842643 and cg24399106, respectively) are in the 5'UTR. The remaining few genes  
194 with overlapping me/eQTLs were *cis*-effects.

195 We prioritized the meQTL.5a and Eaa19 intervals and referred to the liver proteomic data  
196 (also reported in <sup>41</sup>) to search for protein QTLs (pQTLs) in meQTL.5a and Eaa19. At the same  
197 LOD  $\geq$  3.5 threshold, 104 protein variants from 83 unique genes mapped as pQTLs to meQTL.5a  
198 (32 cis-pQTLs). There was more consistency between pQTLs and eQTLs, and *Hsd17b4*, *Psmb8*,  
199 *Psmb9*, and *Psmb10* had trans-eQTLs and trans-pQTLs, and *Pebp1* had cis-eQTL and cis-pQTL in  
200 meQTL.5a (**Data S3**). Similarly, the overlap between eQTLs and pQTLs was higher for Eaa19. In  
201 total, 138 protein variants (57 cis) mapped to Eaa19, and of these, *Abcc2*, *Cutc*, *Cyp2c70*, *Gsto*,  
202 and *Sfxn2* had cis-acting QTLs for both mRNA and protein, and *Cyp1a1* and *Naga* had trans-  
203 eQTLs and trans-pQTLs (**Data S4**).

## 204 Genetic modulation of co-methylation networks in mouse liver

205 We applied a weighted gene co-methylation network analysis (WGCNA) to evaluate  
206 whether the meQTL hotspots could be detected at the network level.<sup>46-49</sup> WGCNA was carried  
207 out on the set of ~28K CpGs. At a soft-threshold power of 6, the CpGs were grouped into 14

208 modules that range in size from 62–13821 CpG members that form tightly correlated networks  
209 (**Data S5; Fig S1a**; the module membership for each of the CpGs are in **Data S2**). For each  
210 module, the module eigengene (ME) is the top principal component of the co-methylation  
211 network and is the representative methylation pattern.<sup>46</sup> The inter-module correlations  
212 between the MEs provide a view of the covariance among the CpG networks (i.e., meta-  
213 network) (**Data S5** and displayed in **Fig S1b**). The MEs can also be tested for  
214 association with major variables such as  
215 age and diet, and this is a convenient way  
216 to assess the network-level impact of  
217 these variables.<sup>49</sup> Unsurprisingly, age was  
218 a significant correlate of the CpG  
219 networks, and 6 of the 14 modules were  
220 significantly correlated with age ( $p <$   
221  $0.001$ ,  $|r| \geq 0.18$ ; **Data S5**). Of these, the  
222 Green module (2092 CpG members),  
223 followed by the Lightgreen module (1761  
224 CpGs), had the tightest correlation with  
225 age ( $r = 0.69$  and  $0.49$ , respectively; **Data**  
226 **S5** and **Fig S1c, S1d**). The large Blue  
227 module with 5067 CpG members was  
228 significantly anti-correlated with age ( $r =$   
229  $-0.34$ ).  
230

231 Our primary focus is on genetic  
232 modulation of these CpG networks, and  
233 we performed QTL mapping for each of  
234 the MEs with age, diet, and body weight  
235 as co-factors. The module-level QTL  
236 mapping was done using the Genome-  
237 wide Efficient Mixed Model (GEMMA)  
238 algorithm implemented on the webtool  
239 GeneNetwork.<sup>50-52</sup> The strongest QTL was  
240 for the small Royalblue module, which  
241 mapped at LOD = 27 to distal Eaa19 (QTL  
242 plots for select modules in **Fig 2**; full QTL  
243 results in **Data S6** and **Fig S2**). The age-  
244 associated modules, Blue and Lightgreen,  
245 also had modest QTLs in Eaa19 (**Fig 2**).  
246 The large Blue module that is  
247 anticorrelated with age mapped at a LOD  
248 = 4.6 to meQTL.5a (**Fig 2**). The Black and  
249 age-associated Lightgreen modules also  
250 had modest QTLs in meQTL.5a (**Data S6**;

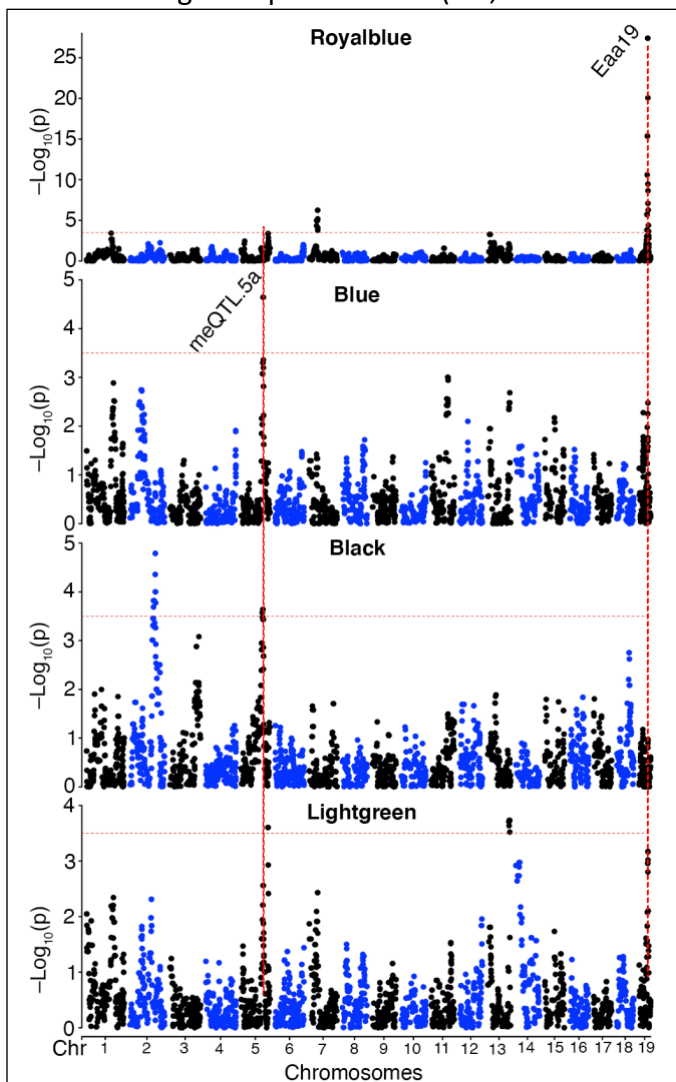

**Fig 2. Genetics of co-methylation CpG networks**  
QTL maps for four module eigengenes (MEs) are shown. Mapping was done using a linear mix model. The horizontal dashed red line marks a relatively lenient threshold of  $-\log_{10}p = 3.5$ . The Blue, Black and Lightgreen modules share suggestive overlapping QTLs in meQTL.5a. Eaa19 has a strong cis-regulatory effect on the Royalblue module. The chromosome 2 peak for the Black module is proximal to meQTL.2b in Table 1.



251 **Fig 2).** For the Royalblue module, 45 of the 62 CpGs members were located in Eaa19, and this  
 252 module mostly represented a correlated network of CpGs that are cis-modulated by variants in  
 253 Eaa19. In contrast, only 29 of the 5067 CpGs in the Blue module were located in meQTL.5a, and  
 254 indicates that the Blue ME captures CpGs that have shared covariance due to a trans-effect  
 255 from meQTL.5a. The Blue module members include 443 of the 502 CpGs that had genome-wide  
 256 peak trans-meQTLs at LOD  $\geq$  3.5 in meQTL.5a.

257 Overall, the WGCNA shows that multiple distal CpGs can form tightly correlated networks  
 258 partly due to shared genetic modulation, and once again highlights meQTL.5a as a CpG  
 259 regulatory hotspot.

## 260 Characterizing the CpGs trans-modulated by meQTL.5a

261 To uncover common biological pathways among the set of trans-CpGs linked to meQTL.5a,  
 262 we performed a genomic regions enrichment analysis using the GREAT tool.<sup>53,54</sup> Compared to  
 263 the background array, the 502 trans-CpGs were highly enriched in developmental and cell  
 264 differentiation genes (**Data S7; Fig 3a**). The CpG regions were also enriched in promoter motifs  
 265 including sequences that are downstream targets of the hepatocyte nuclear factor 4, alpha  
 266 (HNF4A). Additionally, the FOXA1 (HNF3A) TF network was an enriched pathway among the  
 267 meQTL.5a trans-CpGs. A regional enrichment analysis for the CpGs in the Blue module  
 268 highlighted the same pathways and TF networks (**Data S7; Fig 3b**), and this collectively suggests  
 269 that the CpGs modulated by meQTL.5a are related to development, and may be targeted by  
 270 related DNA binding factors, particularly the hepatocyte nuclear factors. In terms of genomic

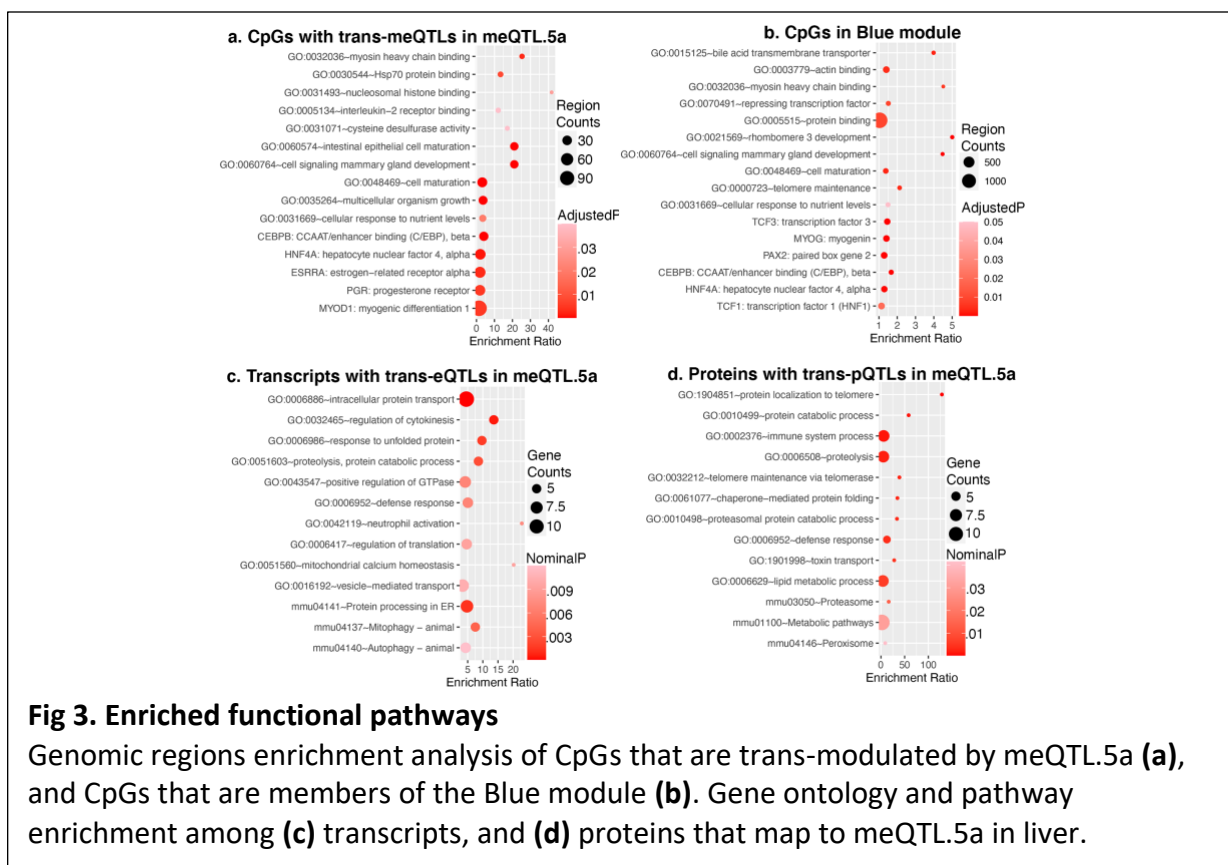

271 context, compared to the background array, the trans-CpGs targeted by meQTL.5a were highly  
272 enriched in predicted enhancer states (e.g., En-Pd, En-Pp, En-Sd, En-Sp, and En-W),<sup>6,55,56</sup> and  
273 were mostly located in introns (**Table S4**).

274 To test if we find intersecting biological functions in the transcriptome and proteome, we  
275 performed a gene ontology (GO) enrichment analysis of the trans-modulated mRNAs and  
276 proteins that map to meQTL.5a (**Data S8**). There were no functionally enriched categories after  
277 FDR correction. At a nominal p-value, the top 10 GO (for biological processes), and top KEGG  
278 pathways for both the trans-modulated proteins and transcripts were related to protein  
279 transport and protein catabolism (**Fig 3b, 3c; Data S8**). The trans-pQTLs were also nominally  
280 enriched in telomere maintenance, and the trans-eQTLs in mitophagy and autophagy. However,  
281 there was limited overlap in functional pathways between the trans-modulated CpGs and trans-  
282 modulated mRNA/proteins.

### 283 **High-priority candidate genes in meQTL.5a**

284 The peak markers in linkage disequilibrium within the meQTL.5a interval are between  
285 114.5–116.5 Mb on Chr5 (**Data S2**). This is the location of genes such as the hepatic TF *Hnf1a*,  
286 the sirtuin gene *Sirt4*, heat shock protein *Hspb8*, and the coenzyme *Coq5* (**Fig 1g**). For candidate  
287 gene ranking, we narrowed to the 114.5–116.5 Mb peak interval and retained positional  
288 candidate genes that (1) have missense or protein truncating variants that segregate in the  
289 BXDs, and/or (2) are modulated in expression by a cis-eQTL. This identified 20 positional  
290 candidates located in the peak region within meQTL.5a (**Table 2**). 14 of these had missense  
291 mutations, and we further used the SIFT (Sorting Intolerant From Tolerant) score to predict the  
292 potential deleterious effects on protein function.<sup>57</sup> SIFT scores range from 0 to 1 with low  
293 values (<0.05) predicted to be deleterious. Variants with low SIFT scores are in *Oasl2*, *Srsf9*, *Pxn*,  
294 *Rab35*, *Cit*, and *Prkab1*, and the variant in *Hnf1a* also had a comparatively low SIFT score (**Table**  
295 **2**).

296 Our next goal was to determine which of these candidate genes formed the most cohesive  
297 functional network(s) with the trans-modulated CpGs. For this, we took the list of genes  
298 cognate to the trans-CpGs (i.e., gene in which the CpG is located, or the nearest gene if CpG is  
299 intergenic), and the list of positional candidates, and searched the STRING database for protein-  
300 protein interactions (PPI).<sup>58</sup> This resulted in a large and highly connected network with an  
301 average node degree of 4.21 (PPI enrichment  $p < 1e-16$ ), and a high enrichment in  
302 developmental genes. The central hub was around the trans-modulated *Crebbp*, which had the  
303 highest degree of nodes at 47 (**Fig S3**). In this CpG-based network, the candidate gene with the  
304 highest degree of connections was *Hnf1a* (13 nodes; **Table S5**). The most enriched KEGG  
305 pathway was ‘maturity onset diabetes of the young’ or MODY (mmu04950), and 6 members in  
306 the central hub were members of this pathway (**Fig 4a**). This included the positional candidate,  
307 HNF1A, which is the causal gene for MODY3.<sup>44</sup> Enriched GO terms included metabolic  
308 processes, cell differentiation, and developmental processes (**Data S9**). *PXN* was another  
309 candidate gene in meQTL.5a with high connectivity, but it formed a more peripheral cluster (**Fig**  
310 **S3**). Other candidates such as *Sirt4* and *Hspb8* had 2 and 0 connections, respectively (**Table S5**).

311 A CpG located in an exon of the hub gene, *Crebbp* (cg27201505), mapped as a strong trans-  
 312 meQTL to meQTL.5a; however, the *Crebbp* transcript had low expression in adult liver, and the  
 313 mRNA had only a weak eQTL in meQTL.5a ( $-\text{Log}_{10}p = 2.09$  at the meQTL.5a peak interval) (**Fig**  
 314 **4b**). Similarly, a CpG (cg12712768) located in the promoter of *Hnf1a* mapped as a strong cis-

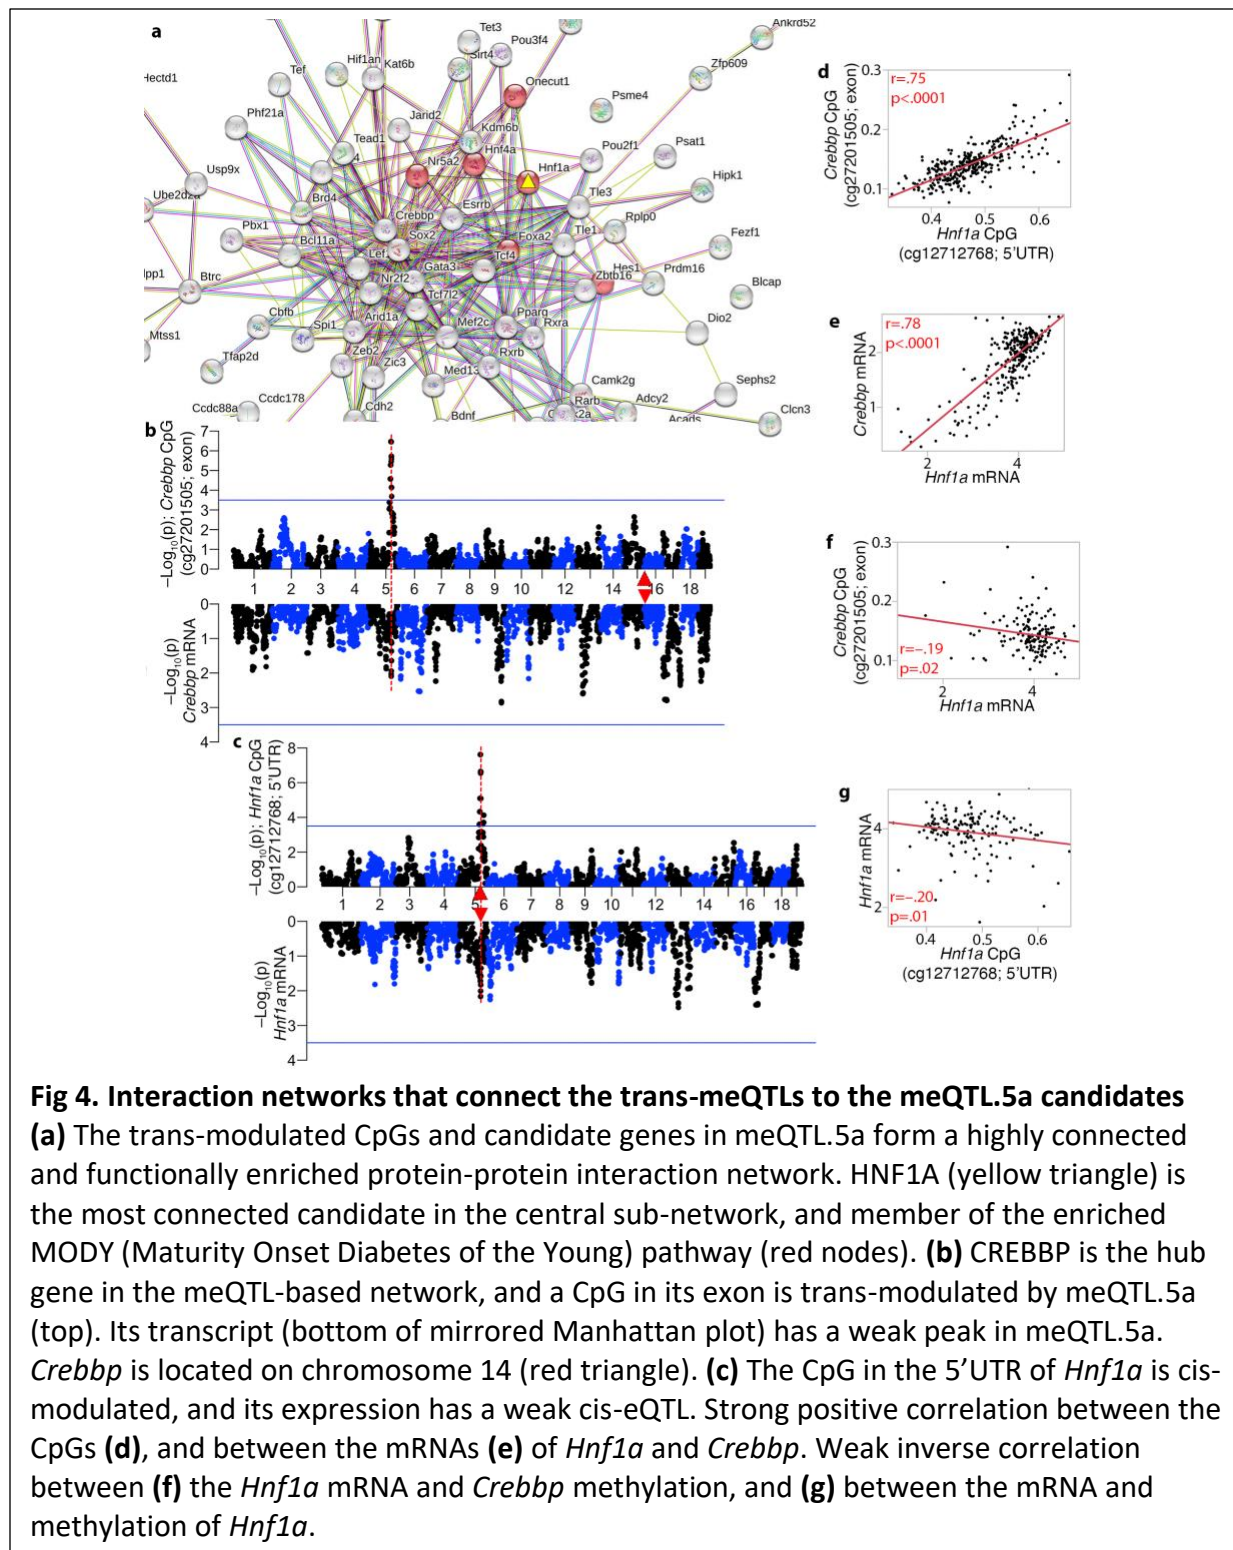

315 meQTL, but the *Hnf1a* mRNA only had weak evidence of cis-modulation (**Fig 4c**). The cis-  
316 modulated CpG in *Hnf1a* had a strong positive correlation with the trans-modulated CpG in  
317 *Crebbp* (**Fig 4d**), and there was also strong positive correlation between their transcripts (**Fig**  
318 **4e**). However, the inter-omic correlations between CpGs and transcripts were relatively  
319 modest, and although CREBBP formed the central node in the PPI network, the expression of  
320 *Crebbp* was uncorrelated with its cognate CpG, and instead, the *Crebbp* transcript had a  
321 modestly significant inverse correlation with the *Hnf1a* CpG (**Fig 4f**). The *Hnf1a* transcript was  
322 also modestly correlated with its CpGs (**Fig 4g**).

323 We performed a similar PPI analysis for the lists of genes with trans-eQTLs, and trans-pQTLs  
324 in meQTL.5a. The trans-modulated mRNAs formed a network with an average node degree of  
325 2.42 (PPI enrichment =  $1e-06$ ; **Fig S3**). The trans-modulated proteins formed a smaller but  
326 highly connected network with average node degree of 2.34 (PPI enrichment =  $5.2e-10$ ; **Fig S4**).  
327 At both the transcriptomic and proteomic levels, HNF1A no longer occupied a central position  
328 (only one degree of connection for HNF1A in both), and instead, OASL2 was the most  
329 connected positional candidate for networks defined from the trans-eQTL and trans-pQTL (**Fig**  
330 **S3, Fig S4**). The functional profiles of the networks were also altered and the most enriched  
331 KEGG pathway in the eQTL-based PPI network was autophagy, and the pQTL-based PPI network  
332 was enriched in metabolic pathways (**Data S8**). The eQTL and pQTL networks shared  
333 similarities; for instance, there was a clique of proteasome subunits (PSMB8, PSMB9, PSMB10)  
334 connected to OASL2, and suggests overlapping interactional and regulatory networks at the  
335 transcriptomic and proteomic levels that are disconnected from the developmental networks at  
336 the methylome level. Overall, this suggests that *Hnf1a* is a strong positional candidate for the  
337 trans-meQTLs, but not for the pathways that connect the trans-modulated expression traits.

338 Due to the apparent centrality of HNF1A within the CpG network, we searched the STRING  
339 database for the top 10 high-scoring interaction partners for HNF1A (**Fig 5a**). The present array  
340 targets only a few highly conserved CpGs in each of these genes. But even with this sparse  
341 profiling of CpGs, 6 of the top 10 PPI interaction partners of HNF1A mapped as trans-meQTLs to  
342 meQTL.5a (two members, PCPD1 and PPARA, did not have meQTL data as no CpG probes in the  
343 mammalian array targeted these genes). We performed pair-wise expression correlations for  
344 these 10 interaction partners and *Hnf1a* using the liver RNA-seq data, and the transcripts  
345 formed a highly interconnected network in which the mRNA for *Hnf1a* was connected to 9 of  
346 the 10 PPI-based members at  $|r| \geq 0.5$  (**Fig 5b**). As was the case for the *Crebbp* and *Hnf1a*  
347 transcripts, the mRNAs of *Foxa2* (**Fig 5c**) and *Hnf4a* also mapped as weak trans-eQTLs to the  
348 same interval (GEMMA based linkage statistics in **Data S6**). For *Gata4*, its mRNA had a relatively  
349 strong trans-eQTL in meQTL.5a (**Fig 5d**).

350 While we cannot dismiss the other genes highlighted in **Table 2**, *Hnf1a* stands out as a  
351 strong candidate for the trans-meQTLs. Our observations suggest that meQTL.5a modulates the  
352 methylation, and to a lesser extent, the expression of genes that functionally interact with  
353 HNF1A. The missense mutation in *Hnf1a* (rs33234601) results in a proline to serine substitution,



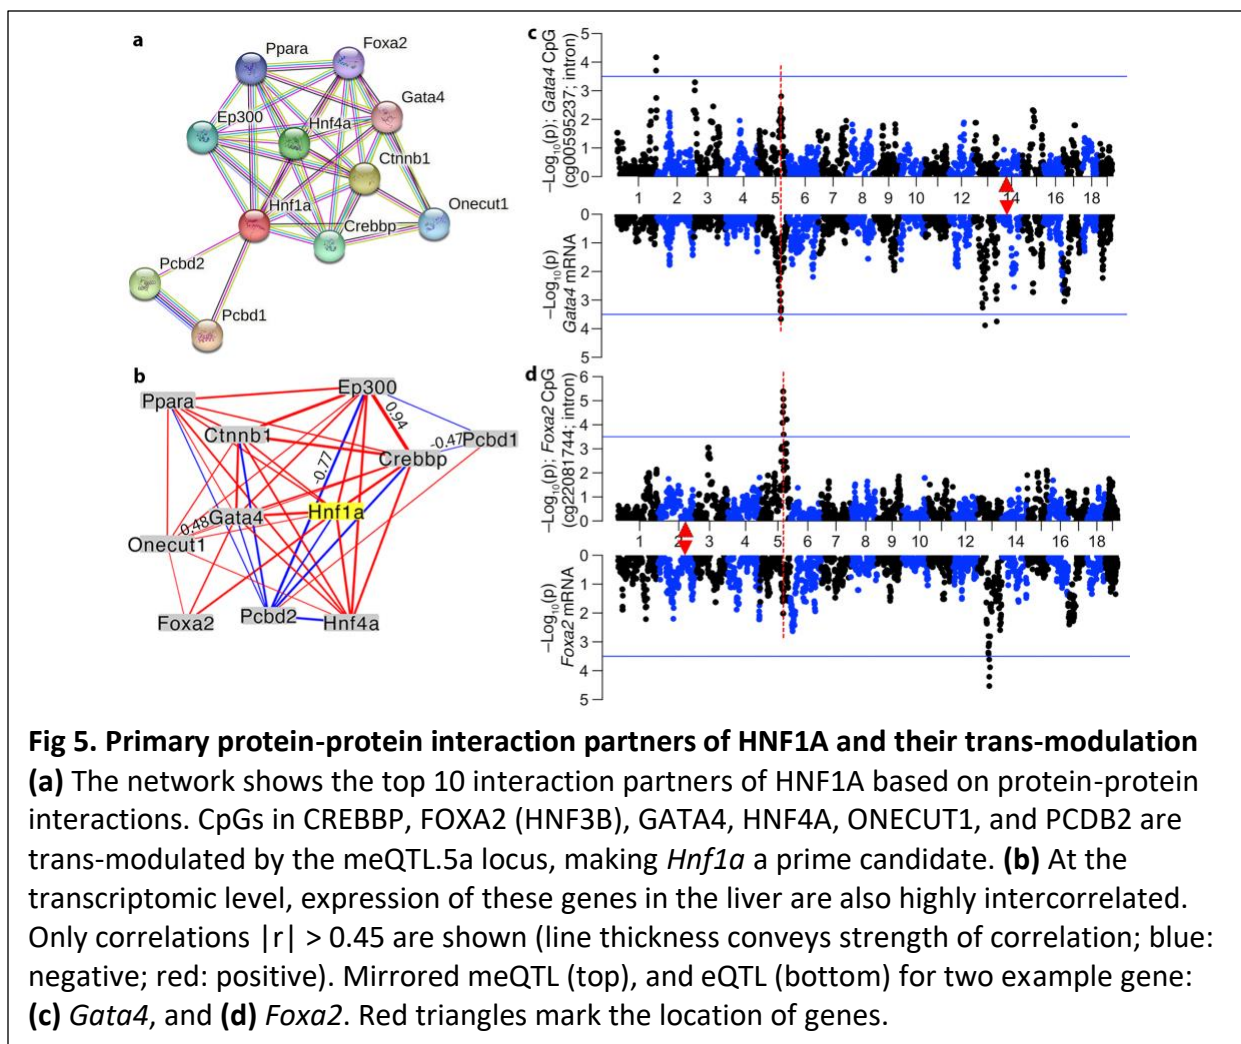

354 with proline as the conserved amino acid across most mammals (based on the comparative  
 355 genomics track on the UCSC Genome Browser).<sup>59</sup>

### 356 Interaction with aging, diet, and potential impact on longevity

357 We next examined how the trans-CpGs interface with aging and diet, and how these may  
 358 potentially influence physiological traits and lifespan. Based on the level of overlap with DMCs  
 359 that we have previously defined,<sup>6</sup> the CpGs trans-modulated by meQTL.5a had 3-fold higher  
 360 enrichment in age-gain CpGs (hypergeometric  $p = 5.4e-92$ ). There were also significant  
 361 enrichments in weight- and diet-CpGs, and modest enrichment in age-loss CpGs, but no DMCs  
 362 related to strain dependent life expectancy (**Fig 6a; Table S6**). Intriguingly, for the age  
 363 dependent trans-CpGs, whether a site gained or lost methylation with aging depended on the  
 364 allele effect of meQTL.5a (**Fig 6b**). Trans-CpGs with  $D$  positive additive effect were more likely to  
 365 gain methylation with age, whereas the few trans-CpGs with higher methylation for the  $B$  allele  
 366 were associated with decrease in methylation with aging (**Fig 6b; Data S2**). This is not due to  
 367 spurious co-segregation between genotype in meQTL.5a since there is not difference in mean  
 368 age between the samples with the  $DD$  genotype ( $421 \pm 170$  days) and those with the  $BB$   
 369 genotype ( $425 \pm 184$ ) (**Data S1**). This pattern of allele-dependent effect of age is exemplified by



370 the CpG located in the 5'UTR of *Jarid2*, a canonical member of the Polycomb-Repressive  
 371 Complex 2 (PRC2) (**Fig 6c**).<sup>60</sup> This CpG gained methylation with age, and across all ages, mice  
 372 with the *D* allele in meQTL.5a tended to have higher methylation. An meQTL map for the *Jarid2*  
 373 CpG using GEMMA is displayed in **Fig 6d**. The expression of *Jarid2* in adult liver was low, and  
 374 showed no covariance with age, but the mRNA mapped as a weak trans-eQTL to meQTL.5a ( $p =$

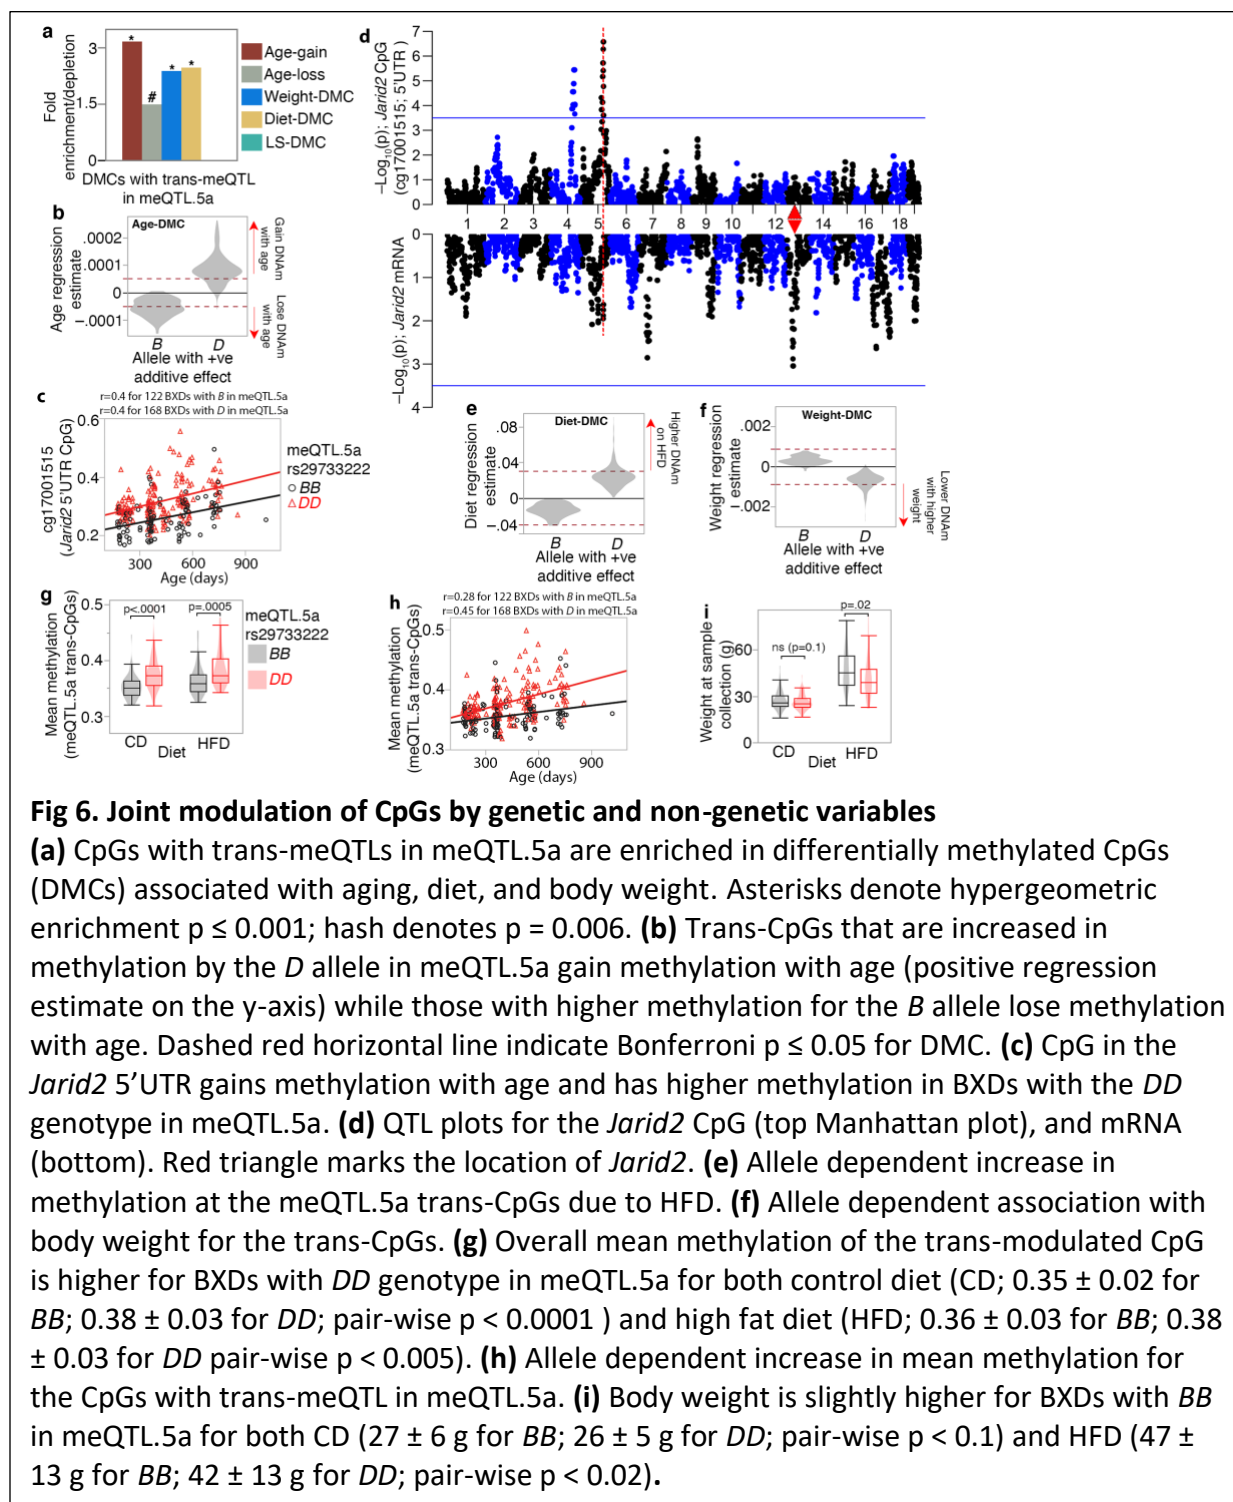

375 0.01). We have previously reported that being fed HFD augments the age-dependent gains in  
376 methylation such that HFD results in a more aged methylome.<sup>6,43</sup> For the meQTL.5a trans-CpGs,  
377 all the CpGs associated with higher methylation for the *D* allele were also increased in  
378 methylation by HFD (**Fig 6e**). These trans-CpGs with higher methylation for the *D* allele were  
379 also more likely to inversely correlate with body weight (**Fig 6f**). Overall, this pattern suggests a  
380 genotype dependent susceptibility of CpGs to the effects of aging and diet.

381 To explore this further, we computed the mean methylation value for all 502 trans-CpGs  
382 targeted by meQTL.5a. As expected, the *DD* genotype in meQTL.5a had higher average  
383 methylation than the *BB* genotype for both diet groups (**Fig 6g**), and similar to *Jarid2*, the mean  
384 methylation increased with age but was overall higher for the *DD* genotype (**Fig 6h**). Body  
385 weight was not directly correlated with the mean methylation of the trans-CpGs, despite the  
386 enrichment in DMCs inversely correlated with body weight among the trans-CpGs. A  
387 multivariable regression showed that the strongest predictor of mean methylation of the trans-  
388 CpGs was age, followed by the meQTL.5a genotype, and then diet, but not body weight (**Table**  
389 **3**). If we treat body weight as the outcome variable, there is only a slightly higher weight for the  
390 *BB* genotype (**Fig 6i**), and a multivariable regression showed a modestly significant association  
391 between weight and meQTL.5a (**Table 3**). This suggests a pleiotropic effect of meQTL.5a on  
392 DNAm and body weight with contrasting allelic effects.

393 We obtained bodyweight and lifespan data from a different BXD cohort that were allowed  
394 to survive until natural mortality.<sup>35</sup> We segregated the samples into two groups based on  
395 homozygous genotype at the meQTL.5a marker, rs29733222: *BB* (n = 801) or *DD* (n = 972), and  
396 tested two predictions: (1) that the *BB* genotype in meQTL.5a will be associated with higher  
397 body weight at age 6 months, and (2) although higher body weight is associated with shorter  
398 lifespan, we predicted that at this locus, based on a more “aged methylome”, the *DD* genotype  
399 will have slightly shorter lifespan. As the longevity cohort has no DNAm data, we could not  
400 directly verify whether the *DD* in this group indeed have a more aged methylome, and this is  
401 purely an assumption based on the meQTL data. As predicted, the *BB* genotype had  
402 significantly higher mean body weight (**Fig 7a, Table 4**). Also consistent with prediction, the *DD*  
403 genotype was associated with a slightly higher risk of death between the ages of 650 and 1100  
404 days compared to the *BB* genotype, but only in the CD group (Log-Rank p = 0.008 for CD; Log-  
405 Rank p = 0.57 for HFD; **Fig 7b, 7c**). This small difference in the CD group resulted in a median  
406 lifespan of 702 days and maximum LS of 1250 days in the *BB* genotype (n = 399), compared to a  
407 median of 685 days and maximum of 1197 days in the *DD* genotype (n = 510). Using a  
408 multivariable regression model with genotype, diet, and bodyweight at 6 months as predictors,  
409 we find that the strongest predictors of lifespan were weight at 6 months, followed by diet, and  
410 then by the meQTL.5a genotype (**Table 4**). Given the strong association between body weight  
411 at young age and longevity,<sup>35</sup> the lifespan advantage for the *BB* genotype becomes more  
412 apparent when we adjust the longevity data for the weight at 6 months (**Fig 7d**). For the CD  
413 mice, after adjusting for weight, the *BB* mice were predicted to have median lifespan that was  
414 46 days longer than the *DD* mice (log-rank p < 0.0001). On HFD, the median lifespan of *BB* was only 7  
415 days longer than the *DD* mice (log-rank p < 0.03). Our results suggest a pleiotropic effect of a  
416 genetic locus on multiple traits that are also modified by diet and aging. Here we use the  
417 terminology by Tyler et al.,<sup>61,62</sup> and the model in **Fig 7e** depicts a horizontal pleiotropic effect

418 on body weight and CpG  
 419 methylation that can moderate  
 420 the association between this locus  
 421 and lifespan. We suggest a modest  
 422 vertical pleiotropic effect on  
 423 lifespan that is mediated by the  
 424 methylome, and the genotype  
 425 with the less aged methylome (*BB*)  
 426 having a slight lifespan advantage.

## 427 Phenome-wide association 428 analysis for *Hnf1a*

429 The BXDs have accrued a vast  
 430 collection of traits over decades,  
 431 and we next performed a  
 432 phenome-wide association  
 433 analysis (PheWAS) to identify  
 434 other higher-order traits that may  
 435 be modulated by the meQTL.5a  
 436 interval.<sup>63</sup> Note that although we  
 437 used "*Hnf1a*" as the term in the  
 438 PheWAS search,<sup>64</sup> the results are  
 439 from family-based linkage  
 440 mapping (not allelic associations),  
 441 and the linkages are to relatively  
 442 large QTL intervals close to the  
 443 *Hnf1a* locus, and not to an *Hnf1a*  
 444 allele. At  $-\text{Log}_{10}p \geq 3$ , there were  
 445 10 BXD traits that included one  
 446 immune related phenotype, four  
 447 traits related to the nervous  
 448 system, and five metabolic traits  
 449 related to fat content and amino  
 450 acid ratios (**Table 5**). The strongest  
 451 QTL was for susceptibility to  
 452 rickettsia infection,<sup>65</sup> however, the  
 453 peak region for this trait was  
 454 proximal to the meQTL.5a interval  
 455 (~104 Mb; GEMMA based linkage  
 456 statistics is **Data S6**). The brain  
 457 related traits were also little  
 458 distant from meQTL.5a (at ~107  
 459 Mb for brain activity measured by  
 460 Ito et al.,<sup>66</sup> and at 117 Mb for cell

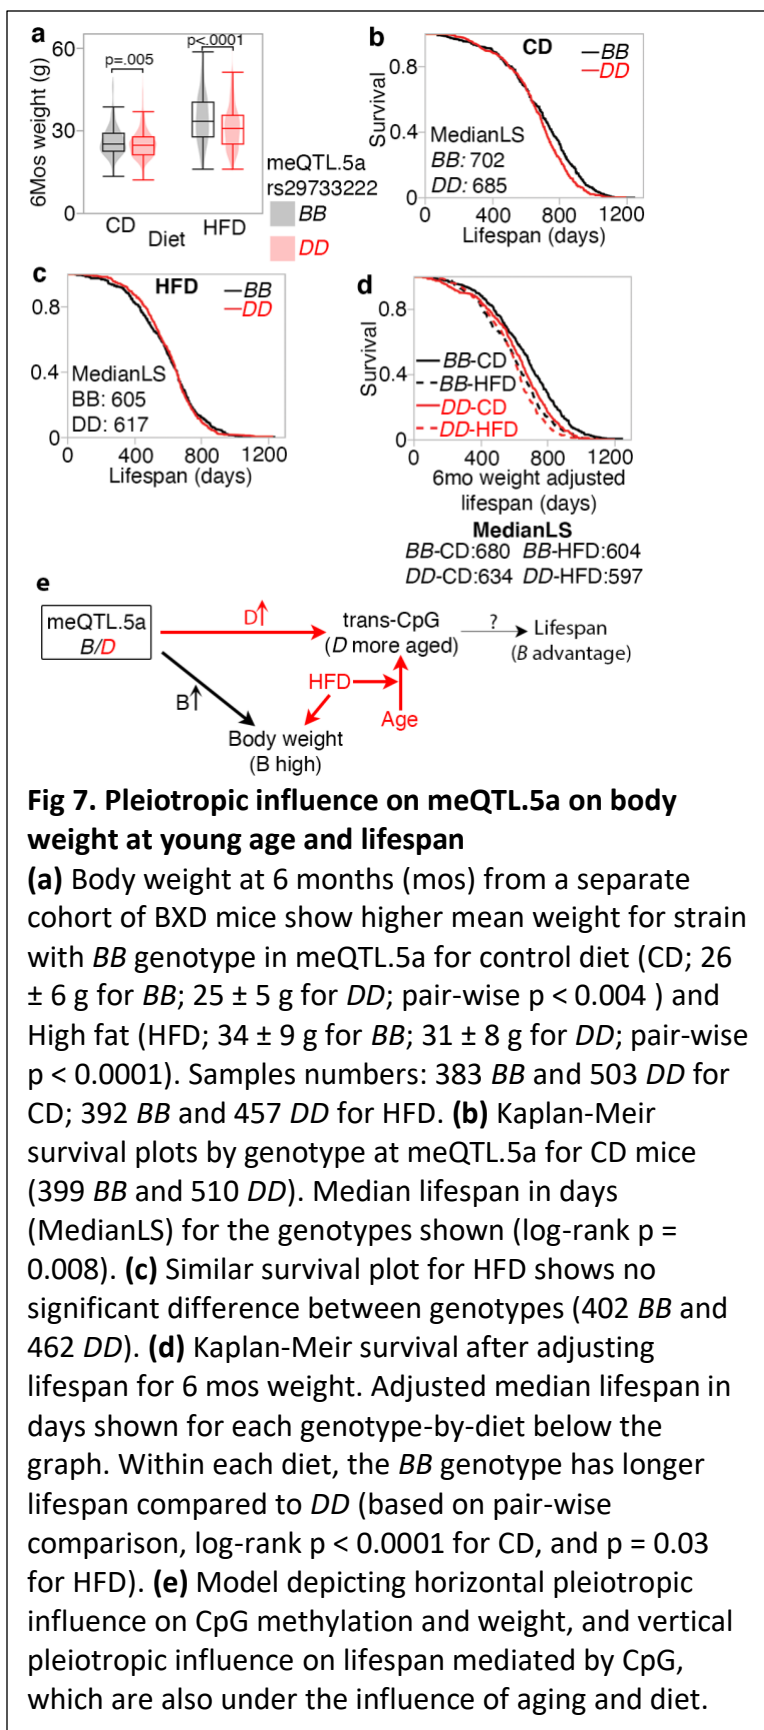

**Fig 7. Pleiotropic influence on meQTL.5a on body weight at young age and lifespan**

**(a)** Body weight at 6 months (mos) from a separate cohort of BXD mice show higher mean weight for strain with *BB* genotype in meQTL.5a for control diet (CD;  $26 \pm 6$  g for *BB*;  $25 \pm 5$  g for *DD*; pair-wise  $p < 0.004$ ) and High fat (HFD;  $34 \pm 9$  g for *BB*;  $31 \pm 8$  g for *DD*; pair-wise  $p < 0.0001$ ). Samples numbers: 383 *BB* and 503 *DD* for CD; 392 *BB* and 457 *DD* for HFD. **(b)** Kaplan-Meier survival plots by genotype at meQTL.5a for CD mice (399 *BB* and 510 *DD*). Median lifespan in days (MedianLS) for the genotypes shown (log-rank  $p = 0.008$ ). **(c)** Similar survival plot for HFD shows no significant difference between genotypes (402 *BB* and 462 *DD*). **(d)** Kaplan-Meier survival after adjusting lifespan for 6 mos weight. Adjusted median lifespan in days shown for each genotype-by-diet below the graph. Within each diet, the *BB* genotype has longer lifespan compared to *DD* (based on pair-wise comparison, log-rank  $p < 0.0001$  for CD, and  $p = 0.03$  for HFD). **(e)** Model depicting horizontal pleiotropic influence on CpG methylation and weight, and vertical pleiotropic influence on lifespan mediated by CpG, which are also under the influence of aging and diet.

461 proliferation<sup>67</sup>). The metabolic traits peaked at the meQTL interval and these included  
462 measures of fat content in liver, and ratio of branched chain amino acids to total amino acids  
463 (**Data S5, Fig S6**).<sup>68-70</sup> Although the QTLs for the metabolic traits are suggestive, it does indicate  
464 a potential role for the meQTL.5a region in higher order metabolism, and similar to the higher  
465 body weight, the *BB* genotype had higher liver fat content.

466 Complementing the murine family-based PheWAS, we also searched for GWAS hits  
467 associated with variants in *HNF1A* using two GWAS databases: GWAS Atlas, and the NHGRI-EBI  
468 GWAS Catalog.<sup>71,72</sup> At minimum  $p < 1e-05$ , the GWAS Atlas identified 85 traits, and the GWAS  
469 Catalog identified over 400 traits associated with variants in *HNF1A* and *HNF1A-AS1*, the  
470 antisense RNA transcribed from *HNF1A* (**Data S10, Data S11**). The trait with the strongest  
471 association was C-reactive protein levels, a measure of inflammation and cardiovascular health,  
472 followed by levels of Gamma glutamyl transpeptidase (GGT), a measure of liver damage.<sup>73-76</sup>  
473 These were followed by lipid levels and coronary artery disease.<sup>77-79</sup> Other traits associated with  
474 *HNF1A* included age at puberty, birth weight, and diabetes.<sup>80-84</sup> While not a replicated genome-  
475 wide significant hit, a variant near *HNF1A* (rs6489785) is reported to be one of 37 “longevity  
476 SNPs” that have a small-effect on human lifespan.<sup>85</sup> This is consistent with our model where the  
477 meQTL.5a locus could make an indirect and modest contribution to lifespan variation.

## 478 Discussion

479 We have provided an overview of the regulatory loci that influence methylation of  
480 conserved CpGs in the murine liver. Overall, the results show complex interrelationships and  
481 genetic pleiotropy on DNA methylation and physiological traits. As expected, cis-meQTLs are  
482 associated with higher LOD scores compared to the trans-meQTLs.<sup>14</sup> Given the strong  
483 contribution of genotype to the variance of cis-CpGs, the cis-modulated CpGs were depleted in  
484 DMCs related to aging and diet. In contrast, the trans-CpGs were enriched in DMCs related to  
485 both genetic traits (lifespan, body weight), and non-genetic variables (aging and diet). In terms  
486 of genomic location, the cis-CpGs were enriched in intergenic sites, which is consistent with  
487 reports from human studies,<sup>8,15</sup> and also in intronic regions, and were highly depleted in 5'UTR  
488 and bivalent promoter states (PrB), which are regions that are strongly modified by aging and  
489 typically show methylation gains over time.<sup>6</sup> This suggests that aging has a limited impact on  
490 CpGs that are under strong cis-modulation. On the other hand, trans-CpGs have multifactorial  
491 variation and could present key sites for gene-by-environment interactions.

492 For meQTL mapping, we implemented a stringent regression model that adjusted for age,  
493 diet, weight, and genetic relatedness, and corrected for unmeasured variance by including the  
494 top principal component as a cofactor. However, note that compared to the statistical  
495 thresholds that are applied in human meQTL studies, we used a rather relaxed threshold of LOD  
496  $\geq 3.5$  for both cis- and trans-effects. This was because our sample size was modest and our  
497 analysis was a family-based linkage mapping done in 41 BXD progeny strains, F1 hybrids, and  
498 the parent strains.<sup>33</sup> If we increase the stringency for the trans-meQTLs to LOD  $\geq 4.5$ , then only  
499 309 strong trans-effects remained and 76 of these (i.e., nearly 25%) were in meQTL.5a. The  
500 relaxed statistical threshold is a caveat to keep in mind. For additional evidence, we evaluated  
501 the trans-meQTLs for biological coherence and overlap with eQTLs. For instance, many of the  
502 immediate interaction partners of *HNF1A* have weak trans-eQTLs overlapping the trans-



503 meQTLs. The other strategy we used was to reduce the dimensionality of the methylome data  
504 by performing an unsupervised clustering of the CpGs into modules and treating the module  
505 eigengenes as the representative quantitative traits, and this too supported meQTL.5a as a  
506 modulator of functionally connected CpG networks.

507 Among the meQTL hotspots Eaa19 is also noteworthy. Eaa19 is linked to epigenetic clock  
508 acceleration, and potentially influences susceptibility to entropy accumulation in the liver  
509 methylome.<sup>6</sup> In our 2022 paper, we identified several candidate genes in Eaa19. However, like  
510 meQTL.5a, Eaa19 is gene dense and harbors several positional candidates. In the present work,  
511 we focused on meQTL.5a, and used several strategies to prioritize the most plausible  
512 candidates. Without dismissing the other candidates (e.g., *Oasl2*, *Srsf9*, *Pxn*, which contain  
513 variants predicted to be deleterious), our analysis led us to *Hnf1a* as a functionally highly  
514 relevant prime suspect in meQTL.5a.

### 515 **Developmental genes, the methylome, and aging**

516 HNF1A is a member of the hepatocyte nuclear factor family of TFs, and is mainly expressed  
517 in the liver, kidney, and pancreas.<sup>86</sup> Other HNF members include HNF4A, FOXA2 (aka, HNF3B),  
518 and ONECUT1, which all have trans-meQTLs in meQTL.5a. During embryonic development, the  
519 HNFs and GATA TFs participate in complex autoregulatory networks that modulate the spatial  
520 and temporal expression of downstream genes.<sup>23,86,87</sup> Targets of HNF1A include the metabolic  
521 and longevity gene, *Igf1* (insulin-like growth factor 1).<sup>87,88</sup> MODY3, which is caused by mutations  
522 in *HNF1A*, is the most common form of maturity onset diabetes of the young.<sup>89,90</sup> *HNF1A*  
523 mutations also lead to dysregulation in fatty acid synthesis and transport that can cause fatty  
524 acid accumulation in the liver.<sup>86</sup> A GWAS study also found that a variant in *HNF1A* (rs6489785)  
525 is one of 169 variants that jointly contribute to human longevity.<sup>85</sup> Some mutations in *HNF1A*  
526 do not cause MODY but increase the susceptibility to type 2 diabetes and lower BMI.<sup>91,92</sup> In  
527 mice, deletion of *Hnf1a* causes Laron dwarfism and hyperglycemia.<sup>93-95</sup>

528 Although HNF1A is not a direct regulator of DNAm, there is some intriguing evidence that it  
529 contributes to the epigenetic state. For instance, deletion of *Hnf1a* in mice causes a change in  
530 the local chromatin structure and affects the spatial location of its target regions in the  
531 nucleus.<sup>96</sup> Furthermore, a study from 2008 showed that CpGs located in HNF1A binding motifs  
532 were hypomethylated in the liver and had tissue-dependent differential methylation that  
533 correlated with gene expression.<sup>97</sup> This suggests that the binding affinity of HNF1A at these  
534 sites could influence CpG methylation. Generally, binding of protein factors (e.g., GATA6, CTCF,  
535 REST) to motifs that contain CpGs result in low methylation.<sup>20,23</sup> In the case of the BXDs, the D2  
536 allele in rs33234601 (Pro423Ser) is the unusual variant as almost all vertebrate species have a  
537 proline at this amino acid position, and only few have serine (e.g., squirrel, elephant; based on  
538 the Vertebrate Multiz Alignment track in the UCSC Genome Browser).<sup>59</sup> Expression of *Hnf1a* has  
539 a modest cis-eQTL that is associated with positive additive effect for the *B* allele at meQTL.5a.

540 Many of these CpGs that are trans-modulated by meQTL.5a are characterized by a low  
541 methylation profile (“hypomethylated” with methylation beta-scores closer to 0), and increase  
542 in methylation with aging (illustrated by the *Jarid2* CpG, and the mean methylation of the trans-  
543 CpGs in **Fig 6**). Since binding by TFs generally result in lower methylation at the binding  
544 motifs,<sup>20,23</sup> we could speculate that the *D* variant of HNF1A has a lower DNA binding affinity,



545 and the BXD strains with *DD* at meQTL.5a could begin life with heightened methylation at the  
546 target sites. If we consider this in terms of epigenetic entropy, then a hypomethylated state  
547 presents a low entropy landscape.<sup>6</sup> For the *DD* genotype however, the methylation beta-values  
548 at these CpGs will be closer to 0.5, and will approach a more random epigenetic state at an  
549 earlier age compared to strains that have a *BB* genotype at meQTL.5a.

550 An interesting feature of the *Hnf1a* gene is that the promoter and first intron overlaps the  
551 long non-coding RNAs (lncRNA), *Hnf1aos1* and *Hnf1aos2*.<sup>98</sup> The cis-regulated CpG in *Hnf1a*  
552 (shown in **Fig 4c**) is in this lncRNA, and the RNA products have been shown to have a cis-acting  
553 regulatory role and implicated in cell proliferation and tumor progression.<sup>98,99</sup> Furthermore,  
554 *Hnf1aos1* interacts with EZH2, the catalytic subunit of PRC2, in liver tissue.<sup>100</sup> Genes that are  
555 regulated by PRC2, and CpG sites that interact with EZH2 are known to be highly susceptible to  
556 age-dependent increases in methylation,<sup>101-103</sup> and the lncRNA is another plausible link  
557 between *Hnf1a* and the epigenome. Notably, one of the strongest trans-modulated CpGs is  
558 located in *Jarid2*, a member of the PRC2 complex,<sup>60</sup> and we can see that while the CpG in *Jarid2*  
559 gains methylation with age, the *DD* strains start out with a higher methylation compared to the  
560 *BB* strains (see **Fig 6c**). This presents links between a development TF and the PRC2 complex  
561 that suggests deeper connections between epigenesis (i.e., embryonic development), and the  
562 aging of the epigenome.

### 563 **Pleiotropy on CpGs and physiological traits**

564 In the BXDs, low body weight at young age predicts longer lifespan and slower epigenetic  
565 aging.<sup>6,35,104</sup> However, the meQTL.5a interval has contrasting allelic effects on body weight and  
566 lifespan. Specifically, despite the higher body weight and higher liver lipid levels for the *B* allele  
567 in meQTL.5a, it is the *D* allele that is associated with slightly shorter lifespan. These effect on  
568 weight (specifically, lower body weight) is also seen in *Hnf1a*-null mice, and *HNF1A* variants in  
569 humans. Generally, when downstream targets of *Hnf1a* are deleted, it results in smaller stature  
570 and longer lifespan in both humans and mice. For instance, deficiency in growth hormone or  
571 IGF1 confers longer lifespan and healthspan.<sup>105,106</sup> In some instances of Laron syndrome (LS),  
572 individuals exhibit insulin resistance and hyperlipidemia but still have long lives.<sup>107,108</sup> Mouse  
573 models of Laron dwarfism also age slower and have longer lifespan.<sup>109,110</sup> However, direct  
574 deletion of *Hnf1a* in mice, or deleterious mutations in *HNF1A* in humans, do not appear to  
575 confer any lifespan advantage despite the mice having a form of Laron dwarfism and humans  
576 have lower BMI.<sup>91-95</sup>

577 We suggest that HNF1A, in addition to its role as a TF for developmental and metabolic  
578 genes, also influences the epigenome early in life, and contributes to epigenomic maintenance  
579 in adulthood and aging. We present a model in which the meQTL.5a locus exerts horizontal  
580 pleiotropic effects on physiological traits and CpG methylation. The pleiotropic influence results  
581 in the *D* allele increasing methylation at sites that typically have low methylation when young,  
582 and the *B* allele increasing body weight and lipid levels. The methylation of the target CpGs,  
583 which are also under convergent influence of aging and diet, then contribute to variation in  
584 survival trait, with the *D* allele associated with slightly shorter lifespan. In this model, lifespan is  
585 a distal complex trait that shows only a modest linkage to meQTL.5a, while the intermediate  
586 traits (the CpGs) have a stronger linkage.

587 In conclusion, we have identified meQTL.5a as a trans-meQTL hotspot that modulates  
588 several CpGs in trans. The pleiotropic effect of meQTL.5a could contribute to variation in body  
589 size, metabolic traits, CpG methylation and lifespan. *Hnf1a* is a key candidate in this locus, and  
590 the potential influence of the HNFs on the epigenomic state during development could  
591 contribute to aging and longevity.

## 592 **Methods**

### 593 **Description of DNAm samples and data**

594 The data we use in this study has been previously reported, and the full data is available  
595 from NCBI Gene Expression Omnibus (GEO accession ID GSE199979).<sup>6</sup> In brief, these are liver  
596 DNAm data generated on the HorvathMammalMethylChip40 array from 339 mice that belong  
597 the BXD Family. Information on each animal (strain, age, weight, diet, etc.) along with all  
598 relevant variables used in this study are provided in **Data S1**.

### 599 **Methylation QTL mapping with R/QTL2**

600 Each CpG was mapped against 7127 informative autosomal genotype markers distributed  
601 across the autosomal chromosomes using the R/qtl2 software.<sup>45</sup> The full methylation data is  
602 available from the NCBI Gene Expression Omnibus database (GEO accession ID GSE199979),  
603 and the genotype data used from mapping is provided as **Data S12**. We performed QTL  
604 mapping using a univariate linear mixed model that accounts for genetic relatedness. We first  
605 computed genotype probabilities and employed that to obtain genetic relatedness matrices  
606 (GRM), or the kinship, using a Leave One Chromosome Out (LOCO) scheme. Genome scans  
607 included age, diet and the top PC as covariates (variables provided in **Data S1**), and were  
608 implemented using a ‘scan1’ function with genotype probabilities as input while adjusting for  
609 relatedness outside the chromosome of interest. We next estimated genetic effects and  
610 genetic directions between the two genotypes was computed as  $(DD - BB)$ . The R codes are  
611 provided as Supplemental information (**Data S13**).

### 612 **CpG co-methylation networks**

613 We used the WGCNA R package to cluster the CpGs into inter-correlated modules.<sup>46</sup> The full  
614 set of CpGs (~28K) was used for network definition. Prior to WGCNA, we performed hierarchical  
615 clustering (hclust function in R with method = “average”) for outlier detection and excluded one  
616 sample (UT153). WGCNA first constructs a pair-wise correlation matrix, and this was converted  
617 to a scale free adjacency matrix using default parameters, and with a soft power threshold,  $\beta =$   
618 6. The  $\beta = 6$  was associated with a mean connectivity of 168, and maximum connectivity of  
619 1560. The adjacency matrix was converted to a topological overlap matrix (TOM), and the  
620 dissimilarity matrix  $(1 - TOM)$ , and the hclust() function with the “average” method was used to  
621 cluster the CpGs. To group the CpGs into modules, we applied the dynamic tree cutting method  
622 (cutreeDynamic), with minimum module size = 35, and deepSplit = 2. This resulted in the 14  
623 CpG families (aka, modules), and the grey module, which had 1284 CpGs that did not fit into the  
624 other modules. The top principal component was derived from each module and taken as the  
625 representative ME. The R codes used are provided as supplementary information (**Data S14**).

## 626 QTL mapping using the Genenetwork web tool

627 Aside from the main meQTL mapping that was done using R/qtl2, addition QTL analyses  
628 were done on the web platform, GeneNetwork, which provide interface to few different  
629 mapping algorithms.<sup>34,52</sup> We used the GEMMA algorithm, which adjusts for the BXD kinship  
630 structure using linear mixed modeling.<sup>50,51</sup> The MEs from the WGCA were uploaded to  
631 Genenetwork, and QTL mapping for each ME was done with age, diet and body weight (weight  
632 at time of tissue collection) as cofactors. Instructions on how to retrieve the ME traits on  
633 GeneNetwork are provided in **Data S6**. QTL mapping for the higher order traits identified by the  
634 PheWAS was also done using GEMMA, and for these, the data are at the strain levels (i.e., strain  
635 means), and instruction on trait retrieval are provided in **Data S6**.

## 636 Enrichment analysis and other statistics

637 As previously described, we have annotated each CpG by genomic context (i.e., intergenic,  
638 3'UTR, intron, exon, 5'UTR) and chromatin state.<sup>6,55,56</sup> For enrichment analysis, we compared  
639 the frequency of these features among the cis- and trans-modulated CpGs relative to the array  
640 background (i.e., ~28K CpGs), and enrichment or depletion p-values were calculated using a  
641 hypergeometric test (formulae provided under **Table S1**). In addition to genomic locations, the  
642 CpGs have been classified into differentially methylated by age, diet (high fat vs normal lab  
643 chow), and body weight based on a multivariable epigenome-wide association analysis.<sup>6</sup> The  
644 frequency of these differentially methylated CpGs among the cis- and trans-modulated CpGs  
645 were also compared against the array background using the hypergeometric test (the R codes  
646 are provided under **Table S2**). All other statistical tests (Pearson correlations, linear regression  
647 modeling, and survival analyses) were done using JMP (version 16).

## 648 Bioinformatic resources

649 For the meQTL.5a trans-modulated CpGs, and CpGs in the Blue module, biological functions  
650 and transcription factor motif enrichment analysis was done using the R package for Genomic  
651 Regions Enrichment of Annotations Tool (rGREAT; version 3).<sup>53,54</sup> The base coordinate for each  
652 CpG was provided (GRCm38/mm10 reference genome), and comparison was against the array  
653 background. For the trans-modulated mRNAs and proteins, we used the gene symbol as the  
654 identifier, and enrichment analysis was done on DAVID.<sup>111</sup> Another enrichment analysis to  
655 connect the trans-modulated genes with the positional candidates was based on protein-  
656 protein networks, and for this, a non-redundant list of the trans-modulated genes and  
657 candidate genes was uploaded to the STRING (version 11.5).<sup>112,113</sup>

658 For candidate gene selection, we search for cis-eQTL in the BXD liver RNA-seq data using the  
659 GeneNetwork search tool.<sup>41</sup> To identify protein truncating and missense variants located in the  
660 positional candidate genes, we use the Ensemble Variant Table tool for the mouse gene  
661 (GRCm38) and the Mouse Genome Informatics variant database, and selected the genes that  
662 had such variants between B6 and D2.<sup>114-117</sup> We used the integrated systems genetics web  
663 platform to perform a PheWAS for the *Hnf1a* locus in the BXDs.<sup>63,64</sup> For human PheWAS, we  
664 used *HNF1A* as the search term and retrieved GWAS hits from two databases: the GWAS Atlas,  
665 and the GWAS Catalog.<sup>71,72</sup>

## 666 **Acknowledgements**

667 The present study used data generated from the biospecimen resource created by the UTHSC  
668 BXD Aging Colony (PI: R Williams), and we have benefitted greatly from Dr. Robert Williams'  
669 vision, leadership, and enthusiasm. We thank all members of the team, especially Dr. Lu Lu,  
670 Casey Chapman, and Dr. Suheeta Roy. We thank all members of the GeneNetwork  
671 Bioinformatics team. This work was funded by the NIA NIH grant R21AG055841. The BXD Aging  
672 Colony was funded by the NIA NIH grant R01AG043930.

## 673 **Competing Interest**

674 Steve Horvath is a founder of the non-profit Epigenetic Clock Development Foundation, which  
675 plans to license several patents from his employer University of California Regents. These  
676 patents list SH as an inventor. The other authors declare no conflicts of interest

677 **Reference:**

- 678 1 Ehrlich, M. & Lacey, M. DNA methylation and differentiation: silencing, upregulation and  
679 modulation of gene expression. *Epigenomics* **5**, 553-568, doi:10.2217/epi.13.43 (2013).
- 680 2 Schuettengruber, B., Bourbon, H. M., Di Croce, L. & Cavalli, G. Genome Regulation by  
681 Polycomb and Trithorax: 70 Years and Counting. *Cell* **171**, 34-57,  
682 doi:10.1016/j.cell.2017.08.002 (2017).
- 683 3 Yang, J. H. *et al.* Loss of epigenetic information as a cause of mammalian aging. *Cell* **186**,  
684 305-326 e327, doi:10.1016/j.cell.2022.12.027 (2023).
- 685 4 Trevino, L. S. *et al.* Epigenome environment interactions accelerate epigenomic aging  
686 and unlock metabolically restricted epigenetic reprogramming in adulthood. *Nat*  
687 *Commun* **11**, 2316, doi:10.1038/s41467-020-15847-z (2020).
- 688 5 Donohoe, D. R. & Bultman, S. J. Metaboloepigenetics: interrelationships between energy  
689 metabolism and epigenetic control of gene expression. *J Cell Physiol* **227**, 3169-3177,  
690 doi:10.1002/jcp.24054 (2012).
- 691 6 Mozhui, K. *et al.* Genetic loci and metabolic states associated with murine epigenetic  
692 aging. *Elife* **11**, doi:10.7554/eLife.75244 (2022).
- 693 7 Field, A. E. *et al.* DNA Methylation Clocks in Aging: Categories, Causes, and  
694 Consequences. *Molecular cell* **71**, 882-895, doi:10.1016/j.molcel.2018.08.008 (2018).
- 695 8 Villicana, S. & Bell, J. T. Genetic impacts on DNA methylation: research findings and  
696 future perspectives. *Genome Biol* **22**, 127, doi:10.1186/s13059-021-02347-6 (2021).
- 697 9 Lin, D. *et al.* Characterization of cross-tissue genetic-epigenetic effects and their  
698 patterns in schizophrenia. *Genome Med* **10**, 13, doi:10.1186/s13073-018-0519-4 (2018).
- 699 10 Huan, T. *et al.* Genome-wide identification of DNA methylation QTLs in whole blood  
700 highlights pathways for cardiovascular disease. *Nature communications* **10**, 4267,  
701 doi:10.1038/s41467-019-12228-z (2019).
- 702 11 Schadt, E. E. *et al.* An integrative genomics approach to infer causal associations  
703 between gene expression and disease. *Nat Genet* **37**, 710-717, doi:10.1038/ng1589  
704 (2005).
- 705 12 Kraus, W. E. *et al.* Metabolomic Quantitative Trait Loci (mQTL) Mapping Implicates the  
706 Ubiquitin Proteasome System in Cardiovascular Disease Pathogenesis. *PLoS genetics* **11**,  
707 e1005553, doi:10.1371/journal.pgen.1005553 (2015).
- 708 13 Nath, A. P. *et al.* An interaction map of circulating metabolites, immune gene networks,  
709 and their genetic regulation. *Genome biology* **18**, 146, doi:10.1186/s13059-017-1279-y  
710 (2017).
- 711 14 Min, J. L. *et al.* Genomic and phenotypic insights from an atlas of genetic effects on DNA  
712 methylation. *Nat Genet* **53**, 1311-1321, doi:10.1038/s41588-021-00923-x (2021).
- 713 15 Hawe, J. S. *et al.* Genetic variation influencing DNA methylation provides insights into  
714 molecular mechanisms regulating genomic function. *Nat Genet* **54**, 18-29,  
715 doi:10.1038/s41588-021-00969-x (2022).
- 716 16 Ma, J. *et al.* Elucidating the genetic architecture of DNA methylation to identify  
717 promising molecular mechanisms of disease. *Sci Rep* **12**, 19564, doi:10.1038/s41598-  
718 022-24100-0 (2022).



- 719 17 Volkov, P. *et al.* A Genome-Wide mQTL Analysis in Human Adipose Tissue Identifies  
720 Genetic Variants Associated with DNA Methylation, Gene Expression and Metabolic  
721 Traits. *PLoS One* **11**, e0157776, doi:10.1371/journal.pone.0157776 (2016).
- 722 18 McRae, A. F. *et al.* Identification of 55,000 Replicated DNA Methylation QTL. *Sci Rep* **8**,  
723 17605, doi:10.1038/s41598-018-35871-w (2018).
- 724 19 Mozhui, K. *et al.* Dissection of a QTL hotspot on mouse distal chromosome 1 that  
725 modulates neurobehavioral phenotypes and gene expression. *PLoS Genet* **4**, e1000260,  
726 doi:10.1371/journal.pgen.1000260 (2008).
- 727 20 Stadler, M. B. *et al.* DNA-binding factors shape the mouse methylome at distal  
728 regulatory regions. *Nature* **480**, 490-495, doi:10.1038/nature10716 (2011).
- 729 21 Hop, P. J. *et al.* Genome-wide identification of genes regulating DNA methylation using  
730 genetic anchors for causal inference. *Genome Biol* **21**, 220, doi:10.1186/s13059-020-  
731 02114-z (2020).
- 732 22 Bonder, M. J. *et al.* Disease variants alter transcription factor levels and methylation of  
733 their binding sites. *Nat Genet* **49**, 131-138, doi:10.1038/ng.3721 (2017).
- 734 23 Suzuki, T. *et al.* GATA6 is predicted to regulate DNA methylation in an in vitro model of  
735 human hepatocyte differentiation. *Commun Biol* **5**, 414, doi:10.1038/s42003-022-03365-  
736 1 (2022).
- 737 24 Gibbs, J. R. *et al.* Abundant quantitative trait loci exist for DNA methylation and gene  
738 expression in human brain. *PLoS genetics* **6**, e1000952,  
739 doi:10.1371/journal.pgen.1000952 (2010).
- 740 25 Bibikova, M. *et al.* Genome-wide DNA methylation profiling using Infinium(R) assay.  
741 *Epigenomics* **1**, 177-200, doi:10.2217/epi.09.14 (2009).
- 742 26 Wong, N. C. *et al.* Exploring the utility of human DNA methylation arrays for profiling  
743 mouse genomic DNA. *Genomics* **102**, 38-46, doi:10.1016/j.ygeno.2013.04.014 (2013).
- 744 27 Gujar, H., Liang, J. W., Wong, N. C. & Mozhui, K. Profiling DNA methylation differences  
745 between inbred mouse strains on the Illumina Human Infinium MethylationEPIC  
746 microarray. *PLoS one* **13**, e0193496, doi:10.1371/journal.pone.0193496 (2018).
- 747 28 Needhamsen, M. *et al.* Usability of human Infinium MethylationEPIC BeadChip for  
748 mouse DNA methylation studies. *BMC bioinformatics* **18**, 486, doi:10.1186/s12859-017-  
749 1870-y (2017).
- 750 29 Zhou, W., Laird, P. W. & Shen, H. Comprehensive characterization, annotation and  
751 innovative use of Infinium DNA methylation BeadChip probes. *Nucleic Acids Res* **45**, e22,  
752 doi:10.1093/nar/gkw967 (2017).
- 753 30 Arneson, A. *et al.* A mammalian methylation array for profiling methylation levels at  
754 conserved sequences. *Nature communications* **13**, 783, doi:10.1038/s41467-022-28355-  
755 z (2022).
- 756 31 Horvath, S. *et al.* DNA methylation clocks tick in naked mole rats but queens age more  
757 slowly than nonbreeders. *Nat Aging* **2**, 46-59, doi:10.1038/s43587-021-00152-1 (2022).
- 758 32 Horvath, S. *et al.* DNA methylation aging and transcriptomic studies in horses. *Nat*  
759 *Commun* **13**, 40, doi:10.1038/s41467-021-27754-y (2022).
- 760 33 Ashbrook, D. G. *et al.* A Platform for Experimental Precision Medicine: The Extended  
761 BXD Mouse Family. *Cell Syst*, doi:10.1016/j.cels.2020.12.002 (2021).

- 762 34 Mulligan, M. K., Mozhui, K., Prins, P. & Williams, R. W. GeneNetwork: A Toolbox for  
763 Systems Genetics. *Methods in molecular biology* **1488**, 75-120, doi:10.1007/978-1-4939-  
764 6427-7\_4 (2017).
- 765 35 Roy, S. *et al.* Gene-by-environment modulation of lifespan and weight gain in the murine  
766 BXD family. *Nat Metab* **3**, 1217-1227, doi:10.1038/s42255-021-00449-w (2021).
- 767 36 Wang, X. *et al.* Joint mouse-human phenome-wide association to test gene function and  
768 disease risk. *Nature communications* **7**, 10464, doi:10.1038/ncomms10464 (2016).
- 769 37 Taylor, B. A., Heiniger, H. J. & Meier, H. Genetic analysis of resistance to cadmium-  
770 induced testicular damage in mice. *Proc Soc Exp Biol Med* **143**, 629-633,  
771 doi:10.3181/00379727-143-37380 (1973).
- 772 38 Taylor, B. A. *et al.* Genotyping new BXD recombinant inbred mouse strains and  
773 comparison of BXD and consensus maps. *Mammalian genome : official journal of the*  
774 *International Mammalian Genome Society* **10**, 335-348 (1999).
- 775 39 Peirce, J. L., Lu, L., Gu, J., Silver, L. M. & Williams, R. W. A new set of BXD recombinant  
776 inbred lines from advanced intercross populations in mice. *BMC genetics* **5**, 7,  
777 doi:10.1186/1471-2156-5-7 (2004).
- 778 40 Hook, M. *et al.* Genetic cartography of longevity in humans and mice: Current landscape  
779 and horizons. *Biochimica et biophysica acta*, doi:10.1016/j.bbadis.2018.01.026 (2018).
- 780 41 Williams, E. G. *et al.* Multiomic profiling of the liver across diets and age in a diverse  
781 mouse population. *Cell Syst* **13**, 43-57 e46, doi:10.1016/j.cels.2021.09.005 (2022).
- 782 42 Warner, H. R., Ingram, D., Miller, R. A., Nadon, N. L. & Richardson, A. G. Program for  
783 testing biological interventions to promote healthy aging. *Mechanisms of ageing and*  
784 *development* **115**, 199-207, doi:10.1016/s0047-6374(00)00118-4 (2000).
- 785 43 Sandoval-Sierra, J. V. *et al.* Body weight and high-fat diet are associated with epigenetic  
786 aging in female members of the BXD murine family. *Aging cell* **19**, e13207,  
787 doi:10.1111/accel.13207 (2020).
- 788 44 Maegawa, S. *et al.* Widespread and tissue specific age-related DNA methylation changes  
789 in mice. *Genome research* **20**, 332-340, doi:10.1101/gr.096826.109 (2010).
- 790 45 Broman, K. W. *et al.* R/qtl2: Software for Mapping Quantitative Trait Loci with High-  
791 Dimensional Data and Multiparent Populations. *Genetics* **211**, 495-502,  
792 doi:10.1534/genetics.118.301595 (2019).
- 793 46 Langfelder, P. & Horvath, S. WGCNA: an R package for weighted correlation network  
794 analysis. *BMC bioinformatics* **9**, 559, doi:10.1186/1471-2105-9-559 (2008).
- 795 47 Langfelder, P. & Horvath, S. Eigengene networks for studying the relationships between  
796 co-expression modules. *BMC Syst Biol* **1**, 54, doi:10.1186/1752-0509-1-54 (2007).
- 797 48 Mozhui, K., Smith, A. K. & Tylavsky, F. A. Ancestry dependent DNA methylation and  
798 influence of maternal nutrition. *PloS one* **10**, e0118466,  
799 doi:10.1371/journal.pone.0118466 (2015).
- 800 49 Horvath, S. *et al.* Aging effects on DNA methylation modules in human brain and blood  
801 tissue. *Genome biology* **13**, R97, doi:10.1186/gb-2012-13-10-r97 (2012).
- 802 50 Zhou, X. & Stephens, M. Genome-wide efficient mixed-model analysis for association  
803 studies. *Nature genetics* **44**, 821-824, doi:10.1038/ng.2310 (2012).

- 804 51 Zhou, X. & Stephens, M. Efficient multivariate linear mixed model algorithms for  
805 genome-wide association studies. *Nature methods* **11**, 407-409,  
806 doi:10.1038/nmeth.2848 (2014).  
807 52 <http://genenetwork.org>.
- 808 53 McLean, C. Y. *et al.* GREAT improves functional interpretation of cis-regulatory regions.  
809 *Nature biotechnology* **28**, 495-501, doi:10.1038/nbt.1630 (2010).
- 810 54 Gu, Z. & Hubschmann, D. rGREAT: an R/bioconductor package for functional enrichment  
811 on genomic regions. *Bioinformatics* **39**, doi:10.1093/bioinformatics/btac745 (2023).
- 812 55 Gorkin, D. U. *et al.* An atlas of dynamic chromatin landscapes in mouse fetal  
813 development. *Nature* **583**, 744-751, doi:10.1038/s41586-020-2093-3 (2020).
- 814 56 Ernst, J. & Kellis, M. ChromHMM: automating chromatin-state discovery and  
815 characterization. *Nat Methods* **9**, 215-216, doi:10.1038/nmeth.1906 (2012).
- 816 57 Ng, P. C. & Henikoff, S. Predicting deleterious amino acid substitutions. *Genome Res* **11**,  
817 863-874, doi:10.1101/gr.176601 (2001).
- 818 58 von Mering, C. *et al.* STRING: known and predicted protein-protein associations,  
819 integrated and transferred across organisms. *Nucleic Acids Res* **33**, D433-437,  
820 doi:10.1093/nar/gki005 (2005).
- 821 59 Blanchette, M. *et al.* Aligning multiple genomic sequences with the threaded blockset  
822 aligner. *Genome Res* **14**, 708-715, doi:10.1101/gr.1933104 (2004).
- 823 60 Li, G. *et al.* Jarid2 and PRC2, partners in regulating gene expression. *Genes Dev* **24**, 368-  
824 380, doi:10.1101/gad.1886410 (2010).
- 825 61 Paaby, A. B. & Rockman, M. V. The many faces of pleiotropy. *Trends Genet* **29**, 66-73,  
826 doi:10.1016/j.tig.2012.10.010 (2013).
- 827 62 Tyler, A. L., Asselbergs, F. W., Williams, S. M. & Moore, J. H. Shadows of complexity:  
828 what biological networks reveal about epistasis and pleiotropy. *Bioessays* **31**, 220-227,  
829 doi:10.1002/bies.200800022 (2009).
- 830 63 Li, H. *et al.* An Integrated Systems Genetics and Omics Toolkit to Probe Gene Function.  
831 *Cell Syst* **6**, 90-102 e104, doi:10.1016/j.cels.2017.10.016 (2018).
- 832 64 <https://systems-genetics.org/phewas>.
- 833 65 Groves, M. G., Rosenstreich, D. L., Taylor, B. A. & Osterman, J. V. Host defenses in  
834 experimental scrub typhus: mapping the gene that controls natural resistance in mice. *J*  
835 *Immunol* **125**, 1395-1399 (1980).
- 836 66 Ito, J. *et al.* Whisker barrel cortex delta oscillations and gamma power in the awake  
837 mouse are linked to respiration. *Nat Commun* **5**, 3572, doi:10.1038/ncomms4572  
838 (2014).
- 839 67 Poon, A. & Goldowitz, D. Identification of genetic loci that modulate cell proliferation in  
840 the adult rostral migratory stream using the expanded panel of BXD mice. *BMC*  
841 *Genomics* **15**, 206, doi:10.1186/1471-2164-15-206 (2014).
- 842 68 Dogan, A. *et al.* ATR-FTIR spectroscopy reveals genomic loci regulating the tissue  
843 response in high fat diet fed BXD recombinant inbred mouse strains. *BMC Genomics* **14**,  
844 386, doi:10.1186/1471-2164-14-386 (2013).
- 845 69 Andreux, P. A. *et al.* Systems genetics of metabolism: the use of the BXD murine  
846 reference panel for multiscalar integration of traits. *Cell* **150**, 1287-1299,  
847 doi:10.1016/j.cell.2012.08.012 (2012).

- 848 70 Leandro, J. *et al.* Mild inborn errors of metabolism in commonly used inbred mouse  
849 strains. *Mol Genet Metab* **126**, 388-396, doi:10.1016/j.ymgme.2019.01.021 (2019).
- 850 71 Watanabe, K. *et al.* A global overview of pleiotropy and genetic architecture in complex  
851 traits. *Nat Genet* **51**, 1339-1348, doi:10.1038/s41588-019-0481-0 (2019).
- 852 72 Sollis, E. *et al.* The NHGRI-EBI GWAS Catalog: knowledgebase and deposition resource.  
853 *Nucleic Acids Res*, doi:10.1093/nar/gkac1010 (2022).
- 854 73 Wojcik, G. L. *et al.* Genetic analyses of diverse populations improves discovery for  
855 complex traits. *Nature* **570**, 514-518, doi:10.1038/s41586-019-1310-4 (2019).
- 856 74 Kanai, M. *et al.* Genetic analysis of quantitative traits in the Japanese population links  
857 cell types to complex human diseases. *Nat Genet* **50**, 390-400, doi:10.1038/s41588-018-  
858 0047-6 (2018).
- 859 75 Han, X. *et al.* Using Mendelian randomization to evaluate the causal relationship  
860 between serum C-reactive protein levels and age-related macular degeneration. *Eur J*  
861 *Epidemiol* **35**, 139-146, doi:10.1007/s10654-019-00598-z (2020).
- 862 76 Sakaue, S. *et al.* A cross-population atlas of genetic associations for 220 human  
863 phenotypes. *Nat Genet* **53**, 1415-1424, doi:10.1038/s41588-021-00931-x (2021).
- 864 77 Shin, S. Y. *et al.* An atlas of genetic influences on human blood metabolites. *Nat Genet*  
865 **46**, 543-550, doi:10.1038/ng.2982 (2014).
- 866 78 Siewert, K. M. & Voight, B. F. Bivariate Genome-Wide Association Scan Identifies 6 Novel  
867 Loci Associated With Lipid Levels and Coronary Artery Disease. *Circ Genom Precis Med*  
868 **11**, e002239, doi:10.1161/CIRCGEN.118.002239 (2018).
- 869 79 Graham, S. E. *et al.* The power of genetic diversity in genome-wide association studies of  
870 lipids. *Nature* **600**, 675-679, doi:10.1038/s41586-021-04064-3 (2021).
- 871 80 Kichaev, G. *et al.* Leveraging Polygenic Functional Enrichment to Improve GWAS Power.  
872 *Am J Hum Genet* **104**, 65-75, doi:10.1016/j.ajhg.2018.11.008 (2019).
- 873 81 Day, F. R. *et al.* Genomic analyses identify hundreds of variants associated with age at  
874 menarche and support a role for puberty timing in cancer risk. *Nat Genet* **49**, 834-841,  
875 doi:10.1038/ng.3841 (2017).
- 876 82 Warrington, N. M. *et al.* Maternal and fetal genetic effects on birth weight and their  
877 relevance to cardio-metabolic risk factors. *Nat Genet* **51**, 804-814, doi:10.1038/s41588-  
878 019-0403-1 (2019).
- 879 83 Mahajan, A. *et al.* Fine-mapping type 2 diabetes loci to single-variant resolution using  
880 high-density imputation and islet-specific epigenome maps. *Nat Genet* **50**, 1505-1513,  
881 doi:10.1038/s41588-018-0241-6 (2018).
- 882 84 Parra, E. J. *et al.* Genome-wide association study of type 2 diabetes in a sample from  
883 Mexico City and a meta-analysis of a Mexican-American sample from Starr County,  
884 Texas. *Diabetologia* **54**, 2038-2046, doi:10.1007/s00125-011-2172-y (2011).
- 885 85 Yashin, A. I., Wu, D., Arbeev, K. G. & Ukraintseva, S. V. Joint influence of small-effect  
886 genetic variants on human longevity. *Aging (Albany NY)* **2**, 612-620,  
887 doi:10.18632/aging.100191 (2010).
- 888 86 Lau, H. H., Ng, N. H. J., Loo, L. S. W., Jasmen, J. B. & Teo, A. K. K. The molecular functions  
889 of hepatocyte nuclear factors - In and beyond the liver. *J Hepatol* **68**, 1033-1048,  
890 doi:10.1016/j.jhep.2017.11.026 (2018).

- 891 87 Duncan, S. A., Navas, M. A., Dufort, D., Rossant, J. & Stoffel, M. Regulation of a  
892 transcription factor network required for differentiation and metabolism. *Science* **281**,  
893 692-695, doi:10.1126/science.281.5377.692 (1998).
- 894 88 Junnila, R. K., List, E. O., Berryman, D. E., Murrey, J. W. & Kopchick, J. J. The GH/IGF-1  
895 axis in ageing and longevity. *Nat Rev Endocrinol* **9**, 366-376,  
896 doi:10.1038/nrendo.2013.67 (2013).
- 897 89 Yamagata, K. *et al.* Mutations in the hepatocyte nuclear factor-1alpha gene in maturity-  
898 onset diabetes of the young (MODY3). *Nature* **384**, 455-458, doi:10.1038/384455a0  
899 (1996).
- 900 90 Byrne, M. M. *et al.* Altered insulin secretory responses to glucose in diabetic and  
901 nondiabetic subjects with mutations in the diabetes susceptibility gene MODY3 on  
902 chromosome 12. *Diabetes* **45**, 1503-1510, doi:10.2337/diab.45.11.1503 (1996).
- 903 91 Li, L. M., Jiang, B. G. & Sun, L. L. HNF1A : From Monogenic Diabetes to Type 2 Diabetes  
904 and Gestational Diabetes Mellitus. *Front Endocrinol (Lausanne)* **13**, 829565,  
905 doi:10.3389/fendo.2022.829565 (2022).
- 906 92 Hegele, R. A., Cao, H., Harris, S. B., Hanley, A. J. & Zinman, B. The hepatic nuclear factor-  
907 1alpha G319S variant is associated with early-onset type 2 diabetes in Canadian Oji-  
908 Cree. *J Clin Endocrinol Metab* **84**, 1077-1082, doi:10.1210/jcem.84.3.5528 (1999).
- 909 93 Lee, Y. H., Sauer, B. & Gonzalez, F. J. Laron dwarfism and non-insulin-dependent  
910 diabetes mellitus in the Hnf-1alpha knockout mouse. *Mol Cell Biol* **18**, 3059-3068,  
911 doi:10.1128/MCB.18.5.3059 (1998).
- 912 94 Yang, X. *et al.* Long non-coding RNA HNF1A-AS1 regulates proliferation and migration in  
913 oesophageal adenocarcinoma cells. *Gut* **63**, 881-890, doi:10.1136/gutjnl-2013-305266  
914 (2014).
- 915 95 Liu, Z. *et al.* Long non-coding RNA HNF1A-AS1 functioned as an oncogene and autophagy  
916 promoter in hepatocellular carcinoma through sponging hsa-miR-30b-5p. *Biochem*  
917 *Biophys Res Commun* **473**, 1268-1275, doi:10.1016/j.bbrc.2016.04.054 (2016).
- 918 96 Luco, R. F., Maestro, M. A., Sadoni, N., Zink, D. & Ferrer, J. Targeted deficiency of the  
919 transcriptional activator Hnf1alpha alters subnuclear positioning of its genomic targets.  
920 *PLoS Genet* **4**, e1000079, doi:10.1371/journal.pgen.1000079 (2008).
- 921 97 Yagi, S. *et al.* DNA methylation profile of tissue-dependent and differentially methylated  
922 regions (T-DMRs) in mouse promoter regions demonstrating tissue-specific gene  
923 expression. *Genome research* **18**, 1969-1978, doi:10.1101/gr.074070.107 (2008).
- 924 98 Beucher, A. *et al.* The HASTER lncRNA promoter is a cis-acting transcriptional stabilizer  
925 of HNF1A. *Nat Cell Biol* **24**, 1528-1540, doi:10.1038/s41556-022-00996-8 (2022).
- 926 99 Liu, Y. *et al.* HNF1A-AS1: A Tumor-associated Long Non-coding RNA. *Curr Pharm Des* **28**,  
927 1720-1729, doi:10.2174/1381612828666220520113846 (2022).
- 928 100 Wang, Y. *et al.* EZH2 RIP-seq Identifies Tissue-specific Long Non-coding RNAs. *Curr Gene*  
929 *Ther* **18**, 275-285, doi:10.2174/1566523218666181008125010 (2018).
- 930 101 Beerman, I. *et al.* Proliferation-dependent alterations of the DNA methylation landscape  
931 underlie hematopoietic stem cell aging. *Cell Stem Cell* **12**, 413-425,  
932 doi:10.1016/j.stem.2013.01.017 (2013).
- 933 102 Dozmorov, M. G. Polycomb repressive complex 2 epigenomic signature defines age-  
934 associated hypermethylation and gene expression changes. *Epigenetics : official journal*



- 935 *of the DNA Methylation Society* **10**, 484-495, doi:10.1080/15592294.2015.1040619  
936 (2015).
- 937 103 Mozhui, K. & Pandey, A. K. Conserved effect of aging on DNA methylation and  
938 association with EZH2 polycomb protein in mice and humans. *Mechanisms of ageing*  
939 *and development* **162**, 27-37, doi:10.1016/j.mad.2017.02.006 (2017).
- 940 104 Sandoval-Sierra, J. V. *et al.* Body weight and high-fat diet are associated with epigenetic  
941 aging in female members of the BXD murine family. *Aging cell*, e13207,  
942 doi:10.1111/accel.13207 (2020).
- 943 105 Guevara-Aguirre, J. *et al.* Growth hormone receptor deficiency is associated with a  
944 major reduction in pro-aging signaling, cancer, and diabetes in humans. *Sci Transl Med*  
945 **3**, 70ra13, doi:10.1126/scitranslmed.3001845 (2011).
- 946 106 Aguiar-Oliveira, M. H. & Bartke, A. Growth Hormone Deficiency: Health and Longevity.  
947 *Endocr Rev* **40**, 575-601, doi:10.1210/er.2018-00216 (2019).
- 948 107 Laron, Z. Do deficiencies in growth hormone and insulin-like growth factor-1 (IGF-1)  
949 shorten or prolong longevity? *Mechanisms of ageing and development* **126**, 305-307,  
950 doi:10.1016/j.mad.2004.08.022 (2005).
- 951 108 Laron, Z., Kauli, R., Lapkina, L. & Werner, H. IGF-I deficiency, longevity and cancer  
952 protection of patients with Laron syndrome. *Mutat Res Rev Mutat Res* **772**, 123-133,  
953 doi:10.1016/j.mrrev.2016.08.002 (2017).
- 954 109 Petkova, S. B. *et al.* Genetic influence on immune phenotype revealed strain-specific  
955 variations in peripheral blood lineages. *Physiological genomics* **34**, 304-314,  
956 doi:10.1152/physiolgenomics.00185.2007 (2008).
- 957 110 Wang, T. *et al.* Epigenetic aging signatures in mice livers are slowed by dwarfism, calorie  
958 restriction and rapamycin treatment. *Genome biology* **18**, 57, doi:10.1186/s13059-017-  
959 1186-2 (2017).
- 960 111 Dennis, G., Jr. *et al.* DAVID: Database for Annotation, Visualization, and Integrated  
961 Discovery. *Genome Biol* **4**, P3 (2003).
- 962 112 Szklarczyk, D. *et al.* The STRING database in 2021: customizable protein-protein  
963 networks, and functional characterization of user-uploaded gene/measurement sets.  
964 *Nucleic Acids Res* **49**, D605-D612, doi:10.1093/nar/gkaa1074 (2021).
- 965 113 Szklarczyk, D. *et al.* STRING v11: protein-protein association networks with increased  
966 coverage, supporting functional discovery in genome-wide experimental datasets.  
967 *Nucleic Acids Res* **47**, D607-D613, doi:10.1093/nar/gky1131 (2019).
- 968 114 Keane, T. M. *et al.* Mouse genomic variation and its effect on phenotypes and gene  
969 regulation. *Nature* **477**, 289-294, doi:10.1038/nature10413 (2011).
- 970 115 Yalcin, B. *et al.* Sequence-based characterization of structural variation in the mouse  
971 genome. *Nature* **477**, 326-329, doi:10.1038/nature10432 (2011).
- 972 116 Blake, J. A. *et al.* Mouse Genome Database (MGD): Knowledgebase for mouse-human  
973 comparative biology. *Nucleic Acids Res* **49**, D981-D987, doi:10.1093/nar/gkaa1083  
974 (2021).
- 975 117 Cunningham, F. *et al.* Ensembl 2022. *Nucleic Acids Res* **50**, D988-D995,  
976 doi:10.1093/nar/gkab1049 (2022).
- 977  
978

979

## Tables

980

**Table 1. Liver meQTL hotspots**

| Name                      | Broad location (peak)     | Liver meQTL   | Hotspot type | Module QTL                        | Liver eQTL   | me/eQTL overlap                                                   |
|---------------------------|---------------------------|---------------|--------------|-----------------------------------|--------------|-------------------------------------------------------------------|
| meQTL.2a                  | Chr2:102–112 (107 Mb)     | 72 (41 cis)   | cis methyl   |                                   | 80 (13 cis)  | <i>Them7</i> (cg10774906); <i>Mpped2</i> (cg07667286, cg00811894) |
| meQTL.2b                  | Chr2:141–151 (144–149 Mb) | 164 (15 cis)  | trans methyl | Green (2092)                      | 27 (13 cis)  | <i>Rem1</i> (cg23754359, cg25361894); <i>Rin2</i> (cg12687767)    |
| meQTL.4a                  | Chr4:114–124 (119 Mb)     | 39 cis        | cis methyl   |                                   | 43 (25 cis)  | <i>Faah</i> (cg08815464, cg15610892, cg19641802, cg06184921)      |
| meQTL.5a                  | Chr5:110–120 (115 Mb)     | 535 (33 cis)  | trans methyl | Blue (5067); Black (1087)         | 376 (36 cis) | <i>Tenm3</i> (trans; cg24399106), <i>Cln3</i> (trans; cg16842643) |
| meQTL.7a                  | Chr7:132–142 (138 Mb)     | 59 (9 cis)    | trans methyl |                                   | 197 (7 cis)  | <i>Mgmt</i> (cg00046614, cg11711038, cg23272565)                  |
| meQTL.14a                 | Chr14:17–27 (23 Mb)       | 51 (32 cis)   | cis methyl   |                                   | 5 cis        | -                                                                 |
| meQTL.14b                 | Chr14: 41–51 (46–49 Mb)   | 184 (19 cis)  | trans methyl | Greenyellow (998)                 | 97 (31 cis)  | <i>Ddhd1</i> (cg17695612; cg10924987); <i>Prmt5</i> (cg24106188)  |
| distal Eaa19 <sup>1</sup> | Chr19:42–52 (48 Mb)       | 103 (100 cis) | cis methyl   | Royalblue (62); Lightgreen (1761) | 274 (43 cis) | <i>Crtac1</i> ; <i>Ldb1</i> ; <i>Psd</i> ; <i>Col17a1</i>         |

981

<sup>1</sup>Epigenetic age acceleration

982

983

**Table 2. Candidate genes in meQTL.5a**

984

| Symbol               | Brief description of annotated function                                            | Chr | Mb    | Missense variants (SIFT score) <sup>1</sup> |
|----------------------|------------------------------------------------------------------------------------|-----|-------|---------------------------------------------|
| <i>Tchp</i>          | Apoptotic process; negative regulator of cell growth; cytoskeleton                 | 5   | 114.7 | rs29566070 (1)                              |
| <i>Git2</i>          | G-protein coupled receptor protein signaling pathway; related to brain development | 5   | 114.7 | rs32133813 (0.86–1)                         |
| <i>1500011B03Rik</i> |                                                                                    | 5   | 114.8 |                                             |

|                |                                                                                                      |   |       |                                                                                                                                                        |
|----------------|------------------------------------------------------------------------------------------------------|---|-------|--------------------------------------------------------------------------------------------------------------------------------------------------------|
| <i>Oasl2</i>   | Purine nucleotide biosynthetic process; immune signaling                                             | 5 | 114.9 | rs29822904 (0.49–0.97); rs32142001 ( <b>0</b> )                                                                                                        |
| <i>Gm13822</i> |                                                                                                      | 5 | 114.9 |                                                                                                                                                        |
| <i>Hnf1a</i>   | Liver-enriched transcription factor; development & growth; MODY3                                     | 5 | 114.9 | rs33234601 ( <b>0.14</b> )                                                                                                                             |
| <i>Acads</i>   | Mitochondrial flavoprotein; acyl-CoA dehydrogenase family; fatty acid beta-oxidation pathway         | 5 | 115.1 |                                                                                                                                                        |
| <i>Coq5</i>    | Mitochondrial co-enzyme; methylation and ubiquinone biosynthetic process; CoQ10 biosynthesis pathway | 5 | 115.3 |                                                                                                                                                        |
| <i>Srsf9</i>   | Pre-mRNA splicing factor; mRNA export                                                                | 5 | 115.3 | rs33739429 ( <b>0</b> )                                                                                                                                |
| <i>Gatc</i>    | Glutaminyt-tRNA synthase; mitochondrial                                                              | 5 | 115.3 | rs33338640 (0.21)                                                                                                                                      |
| <i>Triap1</i>  | p53 binding; DNA damage response; negative regulation of apoptosis; phospholipid transport           | 5 | 115.3 | rs33338640 (0.21)                                                                                                                                      |
| <i>Sirt4</i>   | Sirtuin member; mitochondrial; metabolic processes; mono-ADP-ribosyltransferase                      | 5 | 115.5 | rs46787798 (0.58); rs6400038 (0.32)                                                                                                                    |
| <i>Pxn</i>     | Cytoskeletal; angiogenesis; transforming growth factor beta receptor signaling                       | 5 | 115.5 | rs50194001 (0.39); rs52040466 (0.87); rs46615100 (0.34); rs33590215 (1); rs50879465 (1); rs47873388 ( <b>0.03</b> ); rs33728337 (0.28); rs33892383 (1) |
| <i>Rplp0</i>   | Ribosomal protein                                                                                    | 5 | 115.6 | rs52016292 (1)                                                                                                                                         |
| <i>Rab35</i>   | GTPase activity; neuron projection; mitochondrial                                                    | 5 | 115.6 | rs48405889 ( <b>0</b> )                                                                                                                                |
| <i>Ccdc64</i>  | Small GTPase binding; dynactin binding; golgi to secretory granule transport; neuron projection      | 5 | 115.6 | rs47577059 (1)                                                                                                                                         |
| <i>Cit</i>     | Serine/threonine-protein kinase; cell division; central nervous system development                   | 5 | 115.8 | rs48791426 (1); rs47954950 ( <b>0.01</b> ); rs48893178 ( <b>0.05</b> ); rs48063202 ( <b>0</b> )                                                        |
| <i>Prkab1</i>  | AMP-activated protein kinase; energy sensing; metabolism                                             | 5 | 116.0 | rs46168068 ( <b>0</b> )                                                                                                                                |
| <i>Hspb8</i>   | Heat shock protein; unfolded protein response; Charcot-Marie-Tooth disease                           | 5 | 116.4 |                                                                                                                                                        |

985 <sup>1</sup>The SIFT scores provided within parenthesis predicts the effect of missense mutation on protein function; lower  
 986 scores are more likely to be deleterious. SIFT scores for the missense variants were obtained from the Ensemble  
 987 Browser.

988  
 989

990 **Table 3. Multivariable variable regressions for mean methylation and weight**

| Outcome                                     | Predictors    | Estimate | Std Error | t Ratio | p      |
|---------------------------------------------|---------------|----------|-----------|---------|--------|
| Mean methylation of trans-CpGs <sup>1</sup> | rs29733222[B] | -0.011   | 0.002     | -7.27   | <.0001 |
|                                             | Age (days)    | 6.4E-05  | 8.4E-06   | 7.64    | <.0001 |
|                                             | Diet[CD]      | -0.008   | 0.0021    | -3.84   | 0.0002 |
|                                             | Body weight   | -0.0002  | 0.0002    | -1.45   | 0.15   |
| Body weight <sup>2</sup>                    | rs29733222[B] | 1.517    | 0.5316    | 2.85    | 0.005  |
|                                             | Age (days)    | 0.006    | 0.0030    | 2.17    | 0.03   |
|                                             | Diet[CD]      | -8.94    | 0.5415    | -16.51  | <.0001 |

991 <sup>1</sup>(Mean methylation for meQTL.5a trans-CpGs) ~ genotype + age + diet + weight, where diet is control diet (CD) or  
 992 high fat diet (HFD), and genotype is *BB* (72 on CD, 50 on HFD) or *DD* (105 on CD, 63 on HFD) for marker rs29733222  
 993 in meQTL.5a. <sup>2</sup>Weight ~ genotype + age + diet.

994

995 **Table 4.**

| Outcome                | Term          | Estimate | Std Error | t Ratio | p      |
|------------------------|---------------|----------|-----------|---------|--------|
| Weight_6M <sup>1</sup> | rs29733222[B] | 0.98     | 0.17      | 5.78    | <.0001 |
|                        | Diet[CD]      | -3.38    | 0.17      | -20.11  | <.0001 |
| Lifespan <sup>2</sup>  | rs29733222[B] | 14       | 4.41      | 3.08    | 0.002  |
|                        | Diet[CD]      | 26       | 4.82      | 5.43    | <.0001 |
|                        | Weight_6M     | -4.0     | 0.62      | -6.34   | <.0001 |

996 <sup>1</sup>(Weight at 6 months) ~ genotype + diet. <sup>2</sup>Lifespan ~ genotype + diet + weight at 6 months, where diet is control  
 997 diet (CD) or high fat diet (HFD), and genotype is *BB* (399 on CD, 402 on HFD) or *DD* (510 on CD, 462 on HFD) for  
 998 marker rs29733222 is meQTL.5a.

999

1000 **Table 5. Phenotypes that map to meQTL.5a**

| GN number <sup>1</sup> | Phenotype                                                                                                                                        | Category       | PMID     | -log <sub>10</sub> (p) | QTL peak location           |
|------------------------|--------------------------------------------------------------------------------------------------------------------------------------------------|----------------|----------|------------------------|-----------------------------|
| 17439                  | Rickettsia tsutsugamushi susceptibility of both sexes at 6-12 weeks-of-age                                                                       | Immune         | 6774020  | 4.42                   | Peak at 104 @rs32034514     |
| 17266                  | Brain activity and coherence of electrical field oscillations at 160 Hz in L2/3 of the primary whisker motor cortex                              | Nervous system | 24686563 | 4.03                   | Peak at ~107 Mb @rs29681689 |
| 15092                  | Total fat content measured by Fourier Transform Infrared Spectroscopy in liver at 140 days, males, fed high fat diet fed from 4 weeks on         | Metabolism     | 23758785 | 3.94                   | Peak from 110–114 Mb        |
| 15091                  | Saturated fat content measured by Fourier Transform Infrared Spectroscopy in liver at 140 days, males, fed high fat diet feeding from 4 weeks on | Metabolism     | 23758785 | 3.62                   | Peak from 110–114 Mb        |

|       |                                                                                                                                                                                                            |                |                       |      |                             |
|-------|------------------------------------------------------------------------------------------------------------------------------------------------------------------------------------------------------------|----------------|-----------------------|------|-----------------------------|
| 15094 | Ratio of lipid to protein content in liver at 140 days, males, fed high fat diet from 4 weeks on                                                                                                           | Metabolism     | 23758785              | 3.44 | Peak from 110–114 Mb        |
| 14786 | Proliferation of BrdU-labeled cells in subgranular zone, 1h BrdU injection, unadjusted data                                                                                                                | Nervous system | 24640950              | 3.43 | Peak at 117 Mb @rs29728022  |
| 17265 | Brain activity and coherence of electrical field oscillations at 159 Hz in L2/3 of the primary whisker motor cortex                                                                                        | Nervous system | 24686563              | 3.31 | Peak at ~107 Mb @rs29681689 |
| 16783 | Ratio of total branched-chain amino acid/total amino acid                                                                                                                                                  | Metabolites    | 22939713;<br>30709776 | 3.23 | Peak at 110 Mb @rs49420585  |
| 17245 | Brain activity and coherence of electrical field oscillations, coherence at 139 Hz between local field potentials (LFP) at two sites (0.3 mm apart) in L2/3 of the primary whisker motor cortex in awake 6 | Nervous system | 24686563              | 3.19 | Peak at ~107 Mb @rs29681689 |
| 16774 | Ratio of total branched-chain amino acid/Alanine_CD                                                                                                                                                        | Metabolites    | 22939713;<br>30709776 | 3.1  | Peak at 110 Mb @rs49420585  |

1001 <sup>1</sup>Search carried out using *Hnf1a* as the search key in <https://systems-genetics.org/>; the traits ID can be used to  
 1002 retrieve the BXD strain level data from [www.genenetwork.org](http://www.genenetwork.org)  
 1003



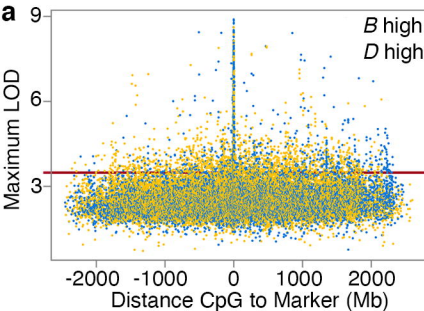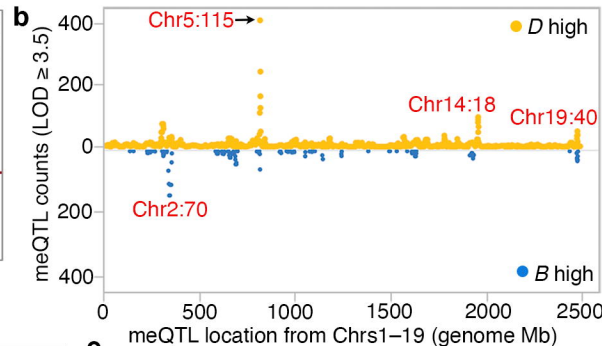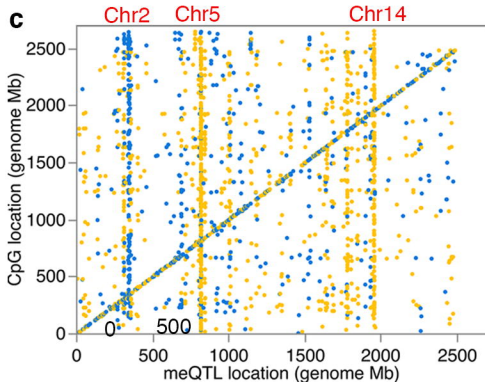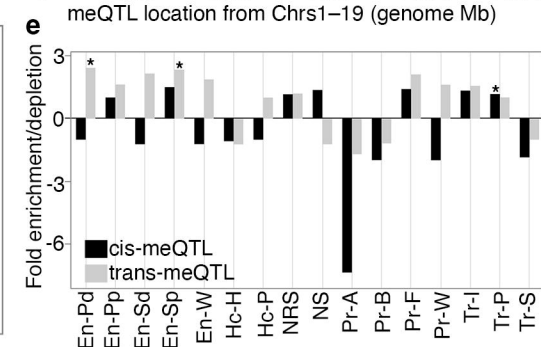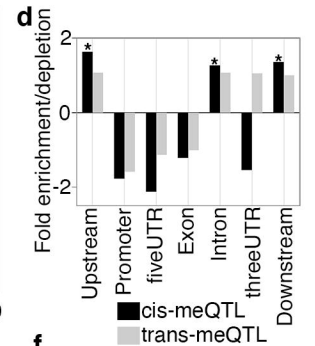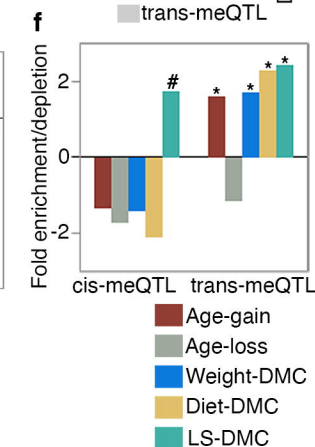

**g** Peak region in meQTL.5a (114.89-115.43; mm10)

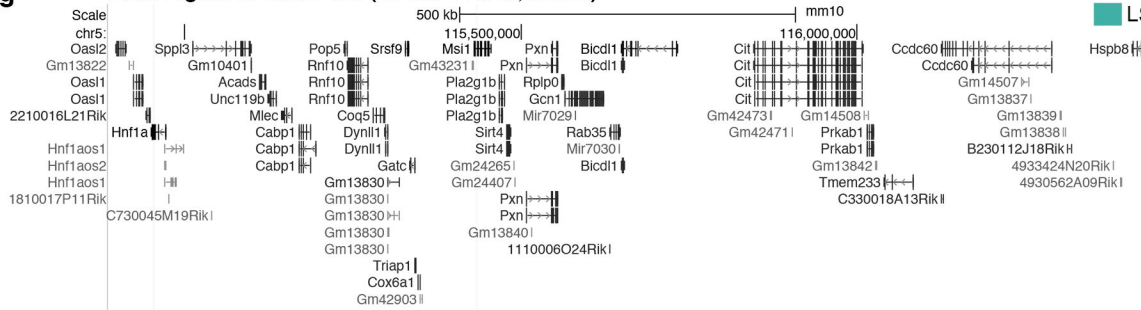

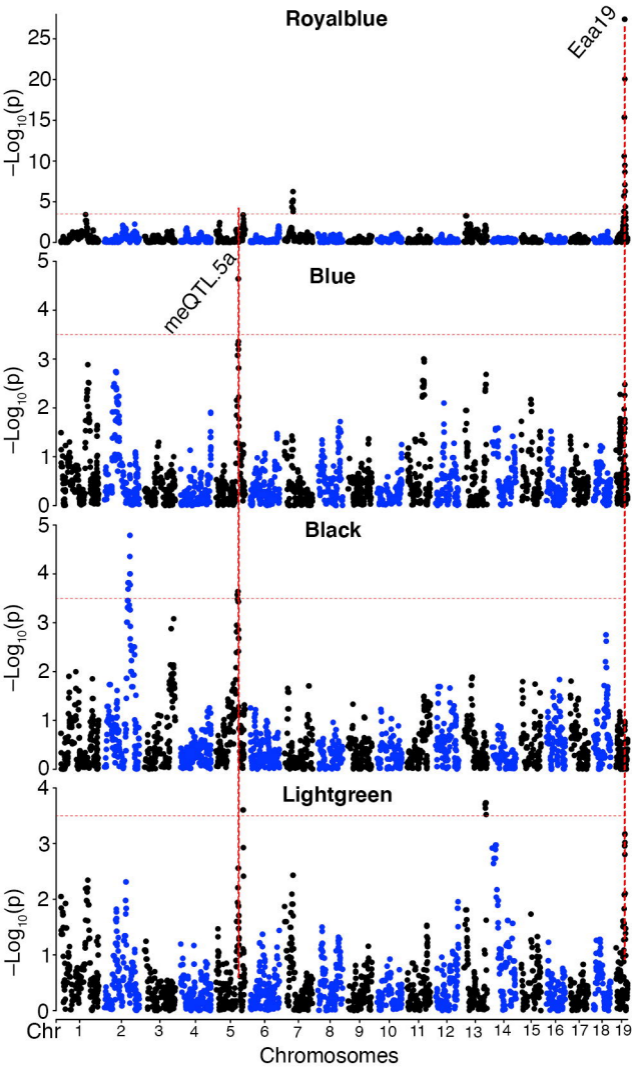

### a. CpGs with trans-eQTLs in meQTL.5a

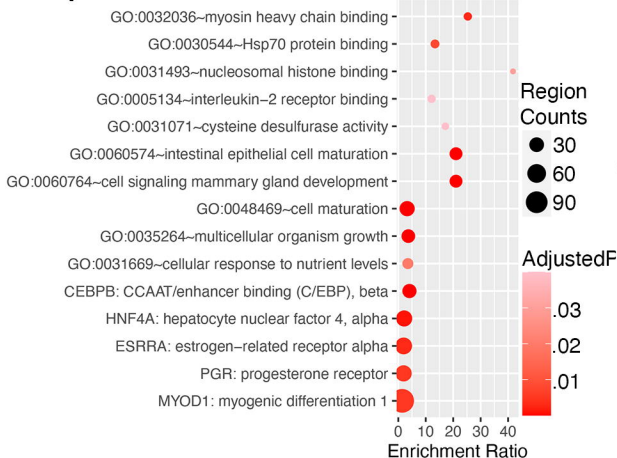

### b. CpGs in Blue module

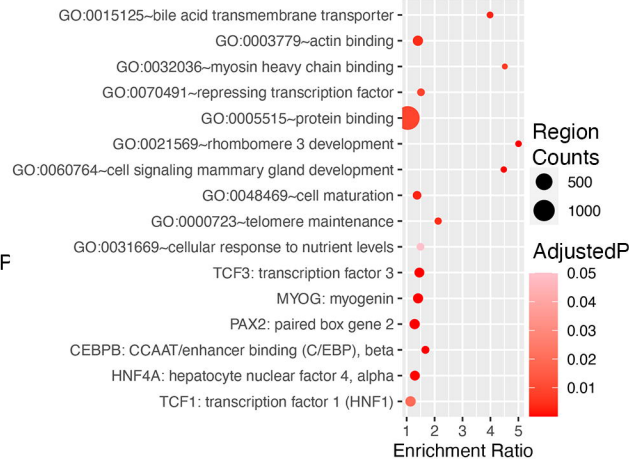

### c. Transcripts with trans-eQTLs in meQTL.5a

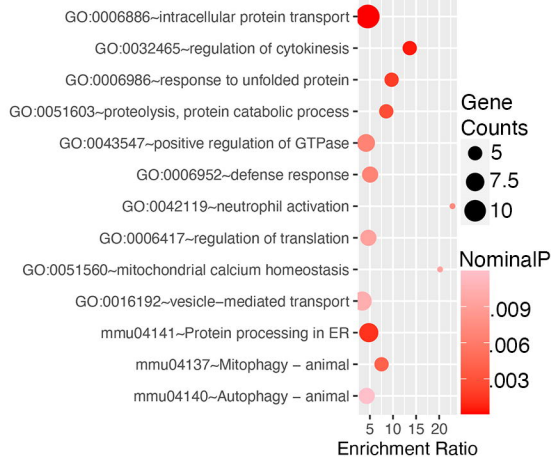

### d. Proteins with trans-pQTLs in meQTL.5a

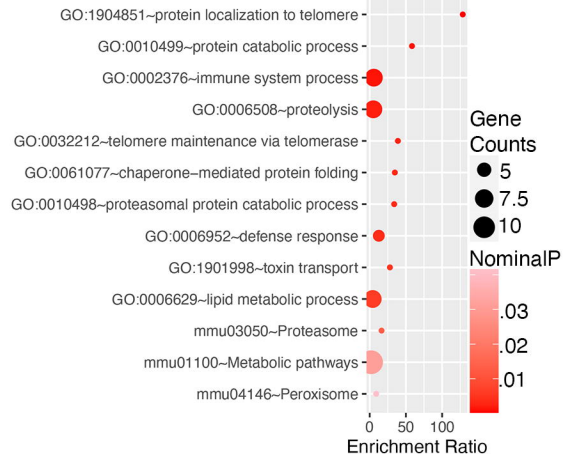

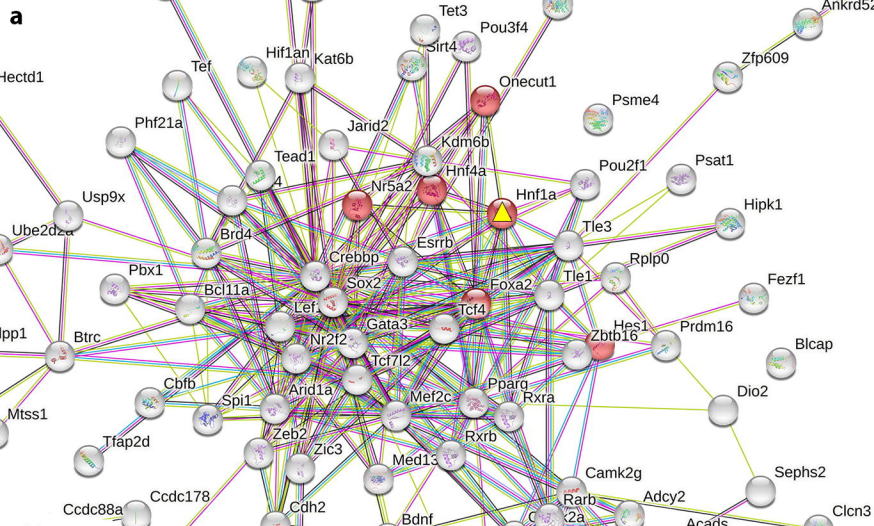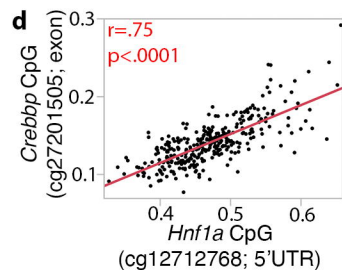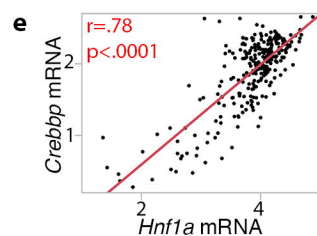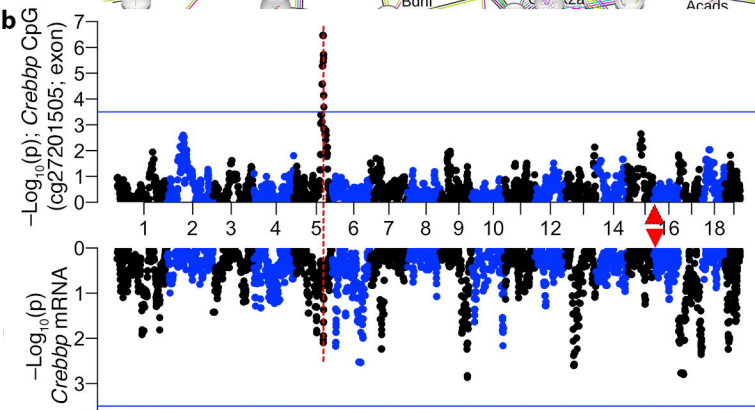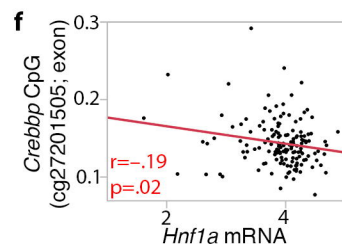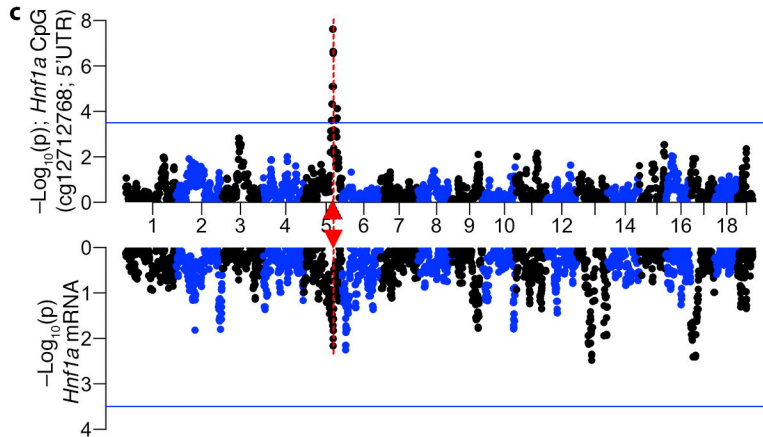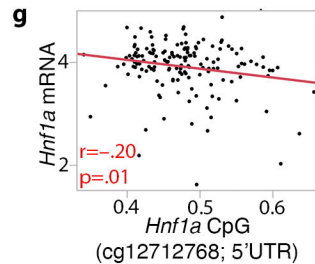

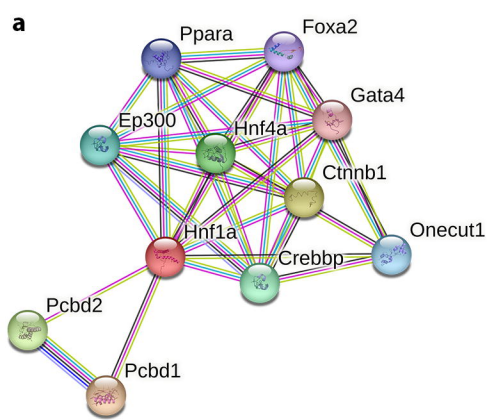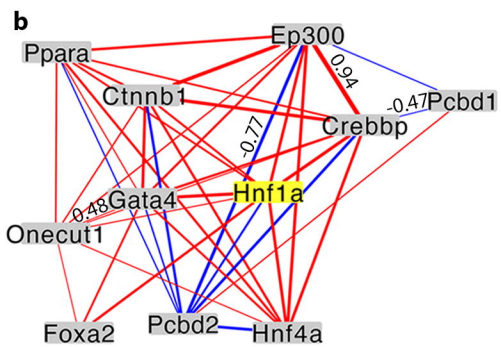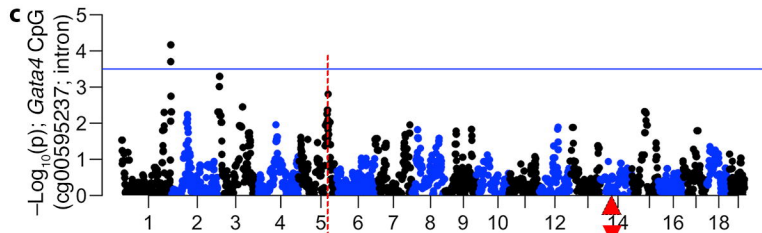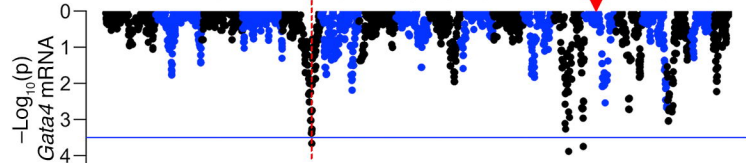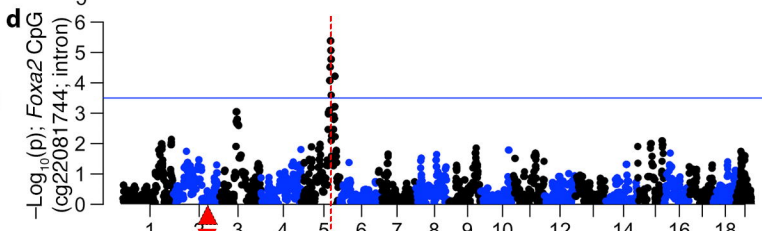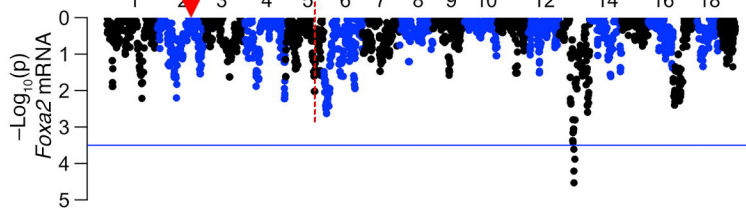



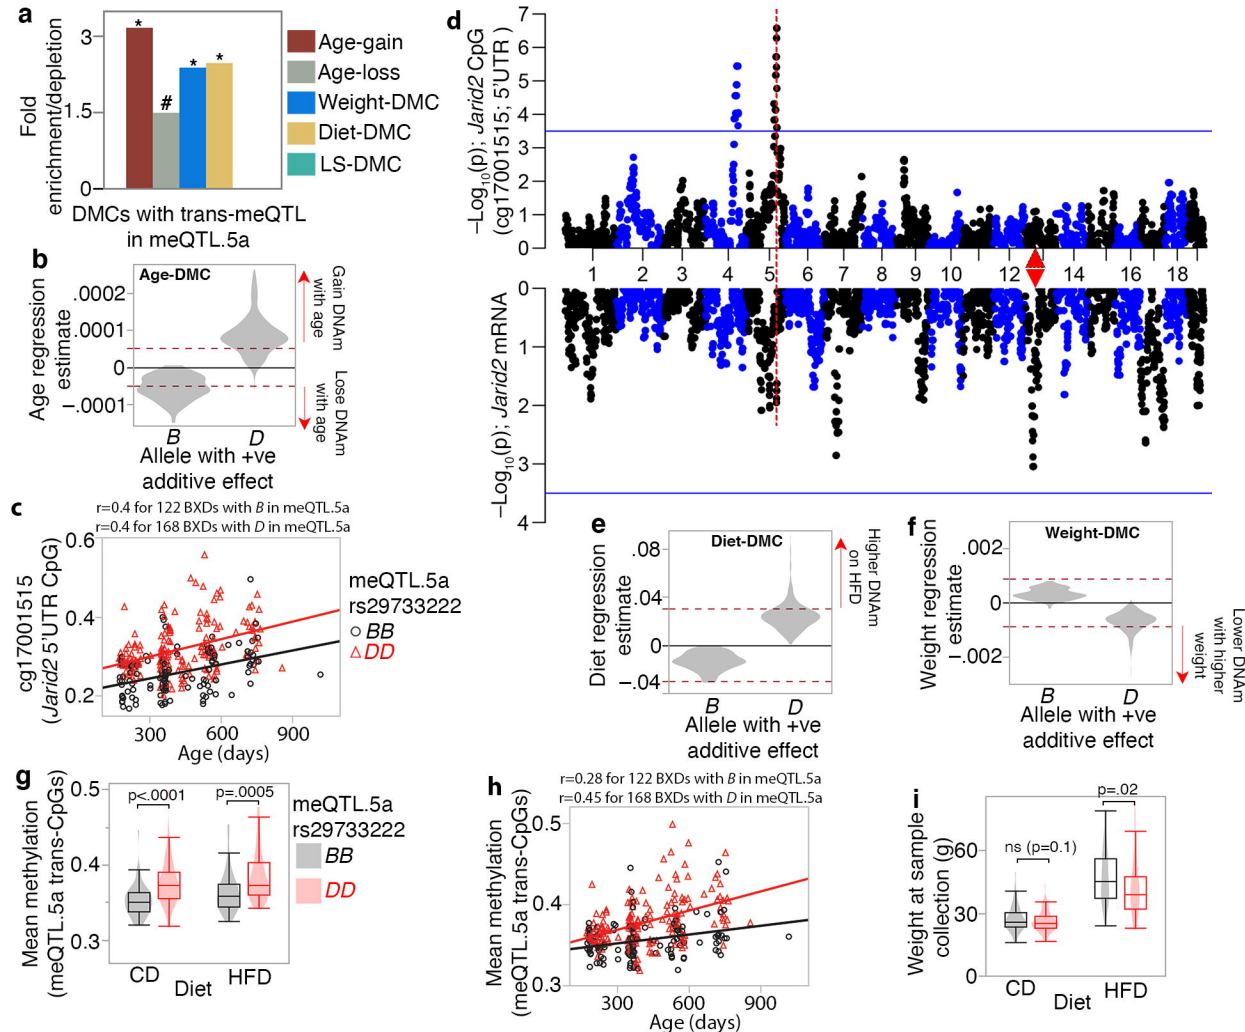

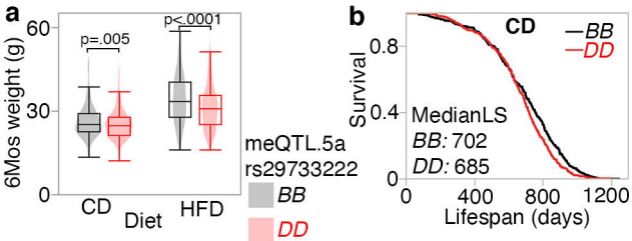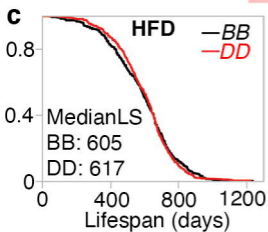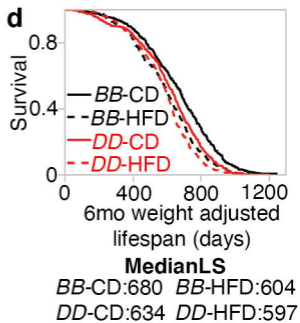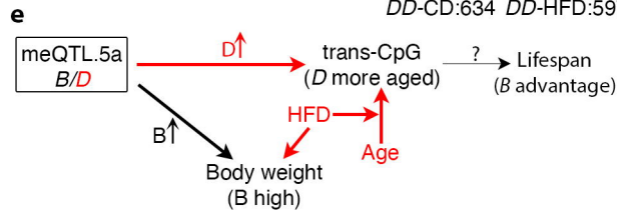

Source: https://www.biorxiv.org/content/10.1101/2023.04.12.536608v1.full.pdf
